1 **FRONT MATTER**

2

3 **Human mobility and poverty as key factors in strategies against COVID-19**

4 Matan Yechezkel¶, Amit Weiss¶, Idan Rejwan¶, Edan Shahmoon, Shachaf Ben-Gal, Dan  
5 Yamin\*

6 Laboratory for Epidemic Modeling and Analysis, Department of Industrial Engineering, Faculty of  
7 Engineering, Tel Aviv University, Tel Aviv 69978, Israel

8

9 ¶ These authors contributed equally to this work

10 \* To whom correspondence should be sent: Dan Yamin, PhD Email: [dan.yamin@gmail.com](mailto:dan.yamin@gmail.com)

11

12

13 **Abstract**

14 The unprecedented COVID-19 pandemic that swiped across the globe led many countries to apply  
15 heavy nationwide restrictions and control measures. Analyzing aggregate and anonymized  
16 mobility data from the cell-phone devices of >3 million users in Israel, we identified that poorer  
17 regions exhibited lower and slower compliance with the restrictions. We integrated these mobility  
18 patterns into age-, risk- and region-structured transmission model, and showed how we can explain  
19 the spatiotemporal dynamics of 250 regions covering Israel. Model projections suggest that  
20 applying localized and temporal interventions that focus on high-risk groups can substantially  
21 reduce mortality, particularly in poorer regions, while enabling daily routine for a vast majority of  
22 the population. These trends were consistent across vast ranges of epidemiological parameters,  
23 possible seasonal forcing, and even when we assumed that vaccination would be commercially  
24 available in 1-3 years. Our findings can help policymakers worldwide identify hotspots and apply  
25 designated strategies against future COVID-19 outbreaks.

26

27 Keywords: human mobility; COVID-19; transmission model; SIR model

28

29 **MAIN TEXT**

30

31 **Introduction**

32 Severe acute respiratory syndrome coronavirus 2 (SARS-CoV-2) was identified in Wuhan, China,  
33 in December 2019. It has since developed into a pandemic wave affecting over 200 countries,  
34 causing over 5.4 million cases and claiming over 340 thousand lives, as of May 24, 2020 (1). The  
35 rapid growth of the SARS-CoV-2 pandemic led to unprecedented control measures on a global  
36 scale. As of May 2020, travel bans, restrictions on mobility of varying degrees, and nationwide  
37 lockdowns have emerged sharply in over 200 countries (2). In Israel, since March 9, 2020, travelers  
38 from any country are being denied entry unless they can prove their ability to remain under home  
39 isolation for 14 days. From March 16 onward, daycare and schools were shut, and work was  
40 limited to less than a third of the capacity. On March 26, inessential travel was limited to 100  
41 meters away from home, and three lockdowns were applied in most regions in Israel to prevent  
42 crowding due to holiday celebrations (3).

43

44 These massive measures in Israel and elsewhere have led to a sharp decline in transmission but  
45 pose a significant humanitarian and economic crisis (4). Recent estimates have suggested that 1.5-  
46 3 month lockdowns will lead to an enormous economic loss, with high variability across countries  
47 ranging between 1.7-13.1% decline in the gross domestic product (4). Thus, given that pandemics  
48 rarely affect all people in a uniform manner (5), it is essential to improve our understanding of the  
49 COVID-19 transmission dynamics to optimize control efforts.

50

51 A variety of factors affect the risk of infection and manifestations, including demographics,  
52 education, underlying conditions, and epidemiological characteristics (6). The high variance in the  
53 severity of the disease for different age groups (7) suggests that age-based strategies might be  
54 effective in reducing mortality. Age-stratified modeling studies show (8) that interventions such  
55 as school closure can help delay the outbreak peak. However, this will not necessary result in a  
56 reduction in the total number of deaths, particularly in light of the estimated time for vaccine  
57 availability being >1 year (9). In addition to age, individuals with comorbidities are 2.8-21.4 times  
58 more likely to become hospitalized following COVID-19 infection (10). Another factor may be  
59 socioeconomic status. Poor populations often live in denser regions and have reduced access to  
60 health services, thereby being most vulnerable during a crisis (5). The considerably high rate of  
61 household transmission for respiratory infections (11) may suggest a higher risk for larger families,  
62 regardless of lockdowns. We explored the impact of these

63

64 Human mobility is a key component of the transmission of respiratory infections, including  
65 COVID-19 (8, 12–15). In particular, the four billion mobile phones in use worldwide are  
66 ubiquitous sensors of individuals' locations and can be used to track mobility patterns, understand  
67 compliance with ongoing restrictions, improve epidemiological investigations, and identify  
68 hotspots (14). The importance of human mobility to predict transmission is further intensified by  
69 the 2.2-11.5 incubation period after exposure, and the observation that as many as 95% of cases

70 are unreported (16). Thus, just like controlling the spread of wildfires, early detection of COVID-  
71 19 infection, is instrumental in containing outbreaks, and may be achieved by utilizing data on  
72 human mobility.

73  
74 We performed an integrated analysis of large-scale data of location records from mobile phones  
75 to explore the spatiotemporal effect of human mobility and poverty on transmission. We integrated  
76 these mobility data into regional age-structured transmission models, and we used our model to  
77 identify efficient and effective strategies for reducing COVID-19 mortality. Our findings can help  
78 policymakers worldwide identify hotspots and apply designated strategies against future  
79 outbreaks.

## 80 81 **Results**

### 82 **Human mobility and poverty**

83 We utilized aggregated and anonymized information about mobility based on cellular data. The  
84 data specifies movement patterns of >3 million users within and between 2,630 zones covering  
85 Israel, on an hourly basis, from February 1, 2020, to May 16, 2020. This period corresponds to the  
86 period from a month before the COVID-19 outbreak began in Israel until 16,600 cases were  
87 reported. Each zone includes ~3500 residents with available information regarding several  
88 socioeconomic characteristics, including household size, age distribution, mean socioeconomic  
89 score, and religion.

90  
91 During the aforementioned period, the government applied and lifted several movement  
92 restrictions. We define a mobility index (MI) as the daily proportion of individuals who traveled  
93 >1.5 km away from their home. While a sharp decline has been observed in the overall population  
94 following restrictions, the decline varied considerably among individuals of different  
95 socioeconomic statuses (SESs). Specifically, during routine days, the low-SES population had the  
96 lowest MI. Shortly after the restrictions started, this trend changed, and populations of all SESs  
97 had similar MIs, while during the lockdowns, the high-SES population had the lowest MI (Figure  
98 1A).

99  
100 Before the COVID-19 outbreak, the population was highly clustered such that people of a specific  
101 SES typically traveled to zones where the residents matched their SES and were therefore more  
102 likely to meet with each other (Figure 1B, and Figures S1 and S2 Supplementary materials).  
103 Likewise, people of similar demographic groups, such as those with the same religious affiliations,  
104 typically traveled to zones where the residents matched their group. These trends further  
105 intensified following the restrictions (Figure 1C). Notably, the clustering was not attributable to  
106 only the geographical distance, as many high-SES zones are geographically close to the low-SES  
107 zone.

108

109

## 110 **Human mobility and poverty explain transmission**

111 To explore the spatiotemporal effect of human mobility and poverty on transmission, we calculated  
112 the number of new cases and the amount of travel between zones observed during three periods:  
113 February 13-March 26, March 27-April 20, and April 20-May 20. These periods correspond to 1)  
114 the early phase before restrictions started, 2) between the time of restrictions and until the  
115 restrictions were lifted, and 3) after restrictions were lifted. Our analysis indicated that during the  
116 first period, the infection was evenly distributed among different SESs (Figure 2A). During the  
117 second period, 71% of the cases were residents of zones with a low SES, particularly religious  
118 orthodox Jews. During the third period, 81% of the cases were residents of low SES, mainly  
119 residents of zones of Israeli Arabs and orthodox Jewish people. We also identified a high  
120 correlation ranging from 79.2-82.8% ( $p$  value $<0.001$ ) with a lag of 12-14 days between the MI and  
121 the disease growth factor, i.e., the number of new cases daily per active case (Figure S3  
122 Supplementary materials). This lag includes the incubation period, the time from symptom onset  
123 until a test is conducted, and the time until the test results arrive.

124

125 We integrated the daily mobility data into an age-, region-, and risk-stratified model for SARS-  
126 Cov-2 transmission. Model parameters were calibrated to the number of new cases daily in 30  
127 regions covering Israel. With only five free parameters, the model recapitulated SARS-Cov-2  
128 trends (Figure 3). For example, the calibrated model showed that the national SARS-Cov-2  
129 infections peaked during March 17-25 (Figure 3B) and yielded age and regional distributions of  
130 SARS-Cov-2 consistent with the data (Figure 3C and D). Our calibration further indicated that a  
131 model ignoring mobility poorly captured the spatiotemporal dynamics and provided  
132 overestimation of disease transmission. We also found that a model that accounted for seasonal  
133 forcing yielded a higher, but not significant ( $p$  value $<0.35$ ), likelihood than a model that did not  
134 account for seasonal forcing (Table S5, Supplementary materials).

135

## 136 **Focused lockdowns reduce mortality**

137 As transmission varied considerably among regions, we projected the number of total deaths for  
138 1-3 years under local and temporal lockdown strategies. Specifically, we simulated three strategies  
139 triggered by a threshold of daily COVID-19 incidence in each of the 250 regions where we  
140 considered a lockdown for 1) the entire population in the region, 2) daycare- and school-age  
141 children (between 0-19 years of age (children), and 3) high-risk groups and individuals  $>65$  years  
142 of age (high-risk). To examine the efficiency of local strategies compared to nationwide strategies,  
143 we also simulated a global strategy triggered by similar national daily incidence. When a lockdown  
144 is applied, we consider the same compliance rate as that observed during previous lockdowns,  
145 which is reflected in our data for each region by different values of the MI and travel between  
146 zones.

147

148 We evaluated the efficiency of the lockdown strategies, defined as the number of deaths averted  
149 per lockdown day (Figure 4). We found that the local strategy of targeting the high-risk group was  
150 substantially more efficient than any other strategy. For example, assuming the proportion of  
151 unreported cases is 85% and a lockdown threshold of 5/10,000 (cases/individuals), a strategy  
152 targeting the high-risk group is 4.3-5.5 times more efficient than a global strategy (Figure 4C and  
153 D).

154  
155 We evaluated the effectiveness of each strategy in reducing mortality (Figure 5). We found that a  
156 strategy locally targeting the high-risk group yielded a lower number of deaths than a strategy  
157 targeting children. For example, assuming the proportion of unreported cases is 85% and a  
158 lockdown threshold of 5/10,000 (cases/individuals), a strategy targeting the high-risk group  
159 resulted in 4,500-4,900 deaths while on targeting children resulted in 7,900-10,500 deaths after  
160 one year (Figure 5). In addition, for lockdown thresholds exceeded 5/10,000, which aligns with  
161 the current practice in Israel, a strategy locally targeting the high-risk group either is projected to  
162 be the most effective or is comparable to the most effective strategies. Although comparable on  
163 the effectiveness, such a policy includes 2.2-5.5 times fewer individuals under lockdowns (Figure  
164 5C and D). These trends were consistent across vast ranges of epidemiological parameters,  
165 different plausible ranges of threshold values, and different considerations of seasonal forcing.

## 166 167 **Discussion**

168 Our key findings suggest that COVID-19 infection does not spread uniformly in the population,  
169 and thus, intervention strategies should be localized and temporal and should focus primarily on  
170 protecting individuals at high risk. Such a strategy can reduce mortality while enabling daily  
171 routine for a vast majority of the population. Furthermore, temporary lockdown strategies that  
172 focus on the population at high risk were found to be most efficient and likely to result in  
173 comparable mortalities to lockdown strategies of all individuals in a region.

174  
175 Our work demonstrates that to understand the spatiotemporal dynamics of transmission, models  
176 must account for mobility as well as behavioral aspects that are associated with sociodemographic  
177 and socioeconomic factors. In particular, we found that SARS-Cov-2 is more likely to spread in  
178 more impoverished regions and is affected by human mobility. The intensive interactions likely  
179 led to higher transmission in developed countries than in developing countries. However, our  
180 model suggested that people of low SES are at higher risk due to poorer compliance and larger  
181 household size.

182  
183 Our analyses indicate that localized lockdowns with incidence thresholds as low as five reported  
184 cases in 10,000 individuals are essential to decrease mortality. This finding underscores the  
185 importance of maintaining a high level of testing (17), particularly in regions with elevated risk of  
186 transmission. However, with such a strategy, at least 2500 total years of lockdowns (equivalent to  
187 a one-day lockdown of 912,500 individuals) are required to prevent a single death. Considering

188 that one day of lockdown is equivalent to a quality of life value that is ~0.85 times that in a routine  
189 day (18), even local lockdowns should be prudently considered from a health economic  
190 perspective. Thus, future modeling studies should also include localized and temporal massive  
191 screening efforts, which result in more focused quarantines and isolations than massive lockdowns.

192  
193 As in any modeling study, we made several simplifying assumptions. Our local lockdowns  
194 correspond to regions with a population of ~36,000 people. A smaller lockdown may be more  
195 efficient but could not be tested by our model. Additionally, with the growing evidence of a  
196 disproportionate risk from COVID-19 to the elderly (10, 19), focused control measures are likely  
197 to be conducted in retirement homes and facilities with populated communities at high risk, which  
198 we did not explicitly account for in our model (20). Although the transmission dynamics are  
199 unlikely to change with such focused interventions, the overall mortality is expected to be lower  
200 than what we have found.

201  
202 While there is a debate in the literature regarding the extent of infectiousness and transmissibility  
203 in children (21), our results highlighted a not less important question: to whom do children  
204 transmit? Our findings reveal that children are less likely to transmit to populations at risk, and  
205 thus, a differential lockdown strategy that targets children is not the most efficient or effective in  
206 reducing mortality.

207  
208 In conclusion, we showed that using aggregated and anonymized human mobility data from  
209 cellular phones under the General Data Protection Regulation (GDPR) guidelines is a powerful  
210 tool to improve the understanding of transmission dynamics and to evaluate the effectiveness of  
211 control measures. Our transmission model predicted that rather than nationwide lockdowns,  
212 applying temporal and localized lockdowns that focus on groups at high risk can substantially  
213 reduce mortality. Such focused measures will enable a vast majority of the population to maintain  
214 a daily routine. Our findings can help policymakers worldwide identify hotspots and apply  
215 designated strategies against the ongoing outbreak and future second waves.

216  
217 **Materials and Methods**

218  
219 **Human mobility**

220 Our data include mobility records based on cellular data of >3 million users from one of the largest  
221 telecommunication companies in Israel. With the exception of children <10 years of age, the users  
222 are well representative of Israel demographically, ethnically, and socioeconomically. In  
223 accordance with the GDPR, the data include aggregated and anonymized information. The data  
224 specifies movement patterns within and between 2,630 zones covering Israel, on an hourly basis,  
225 from February 1, 2020, until May 16, 2020. To ensure privacy, if less than 50 individuals were  
226 identified in the zone in a given hour, the number of reported individuals was set to zero.

227

228 We determined the location of individuals based on the triangulation of cell towers, which was  
229 found to be accurate to 300 meters in most cases but varied by up to 1 km in less populated areas.  
230 To prevent signal noise and identify stay points, we tracked only locations where users stayed for  
231 at least 15 minutes within a distance threshold of 1.7 km. We defined users as residents of a zone  
232 based on the location at which they had the highest number of signals on most nights during  
233 February 2020.

234  
235 To calculate the MI for each zone, we counted the daily number of individuals in each group that  
236 showed a signal away from their home location. Conservatively, we counted only individuals who  
237 were located more than 1.5 km away from home.

238  
239 Next, we integrated data from the Central Bureau of Statistics (CBS) that specifies several  
240 socioeconomic characteristics, including population size, household size, age distribution,  
241 socioeconomic score, and dominant religion, for each zone. Each zone includes ~3,500 residents.  
242 For each zone, we scaled the number of resident users of the telecommunication company to match  
243 the actual number of residents in the zone, as reported by the Israeli CBS. The CBS specifies for  
244 each zone a socioeconomic cluster from 1 to 10. Based on these clusters, we defined three SES  
245 groups that were nearly equal in size: low (clusters 1-3), middle (clusters 4-7), and high (clusters  
246 8-10). We aggregated the MI according to SES to test the mobility trends on a national level  
247 (Figure 1A). To evaluate the travel patterns based on an individual's SES (Figure 1B and 1C), we  
248 counted the mean daily number of travels between the 2,630 zones, including for those individuals  
249 who stayed in their origin zone. Grouping by SES and scaling the daily number of travels to one  
250 for each zone, we created an origin-destination travel probability matrix.

251  
252 To analyze the relationship among poverty, mobility, and transmission (Figure 2), we divided the  
253 data into three periods: 13 Feb-26 Mar, 27 Mar-19 Apr, and 20 Apr-15 May, corresponding to 1)  
254 the early phase before restrictions started, 2) the time from restrictions until they were first lifted,  
255 and 3) after the restrictions were lifted. For each period, we ranked municipalities with a population  
256 of >10,000 residents based on the number of new cases per person observed in each period. For  
257 improved clarity of Figure 2, we present the 50 most prevalent municipalities. We calculated for  
258 each city the number of newly reported cases, the socioeconomic groups, and the distribution of  
259 travels to the other 49 municipalities.

260  
261 **Transmission model**  
262 We developed a dynamic model for age-, risk- and region-stratified SARS-Cov-2 infection  
263 progression and transmission in Israel. Our model is a modified susceptible exposed infected  
264 recovered (SEIR) compartmental framework (22), whereby the population is stratified into health-  
265 related compartments, and transitions between the compartments change over time (Figure 3). To  
266 model age-dependent transmission, we stratified the population into age groups: 0-4 years, 5-9  
267 years, 10-19 years, 20-29 years, 30-39 years, 40-49 years, 50-59 years, 60-69 years and  $\geq 70$  years.

268 We distinguished high-risk and low-risk individuals in each age group based on the ACIP case  
269 definition (23, 24). We also distinguished the 250 regions covering Israel in the model.

270

271 The mean incubation period of SARS-Cov-2 is 6.4 days (95% CI, 5.6 to 7.7 days) (25, 26), but  
272 early evidence shows that viral shedding occurs during a presymptomatic stage (27, 28). Thus, we  
273 considered an exposure period  $E$  and an early infectious period  $I^{exposed}$ . Underreporting arises  
274 from asymptomatic cases or mild cases in individuals who do not seek care. Thus, following the  
275 early infectious phase, individuals in the model transition either to an infectious and reported  
276 compartment  $I^{reported}$  or to an infectious and unreported compartment  $I^{unreported}$  (29, 30).

277

278 Multiple infections with SARS-Cov-2 are not yet fully understood. A recent study indicated that  
279 there is protective immunity following infection (31). This result is consistent with a previous  
280 study indicating that for SARS-Cov-1, memory T cells persist for up to 11 years (32). In addition,  
281 similar to other respiratory infections, it is likely that if reinfection occurs, it is less severe and less  
282 transmissible (33). Thus, we assumed that upon recovery, individuals are fully protected, which is  
283 consistent with other SARS-COV-2 transmission models (34) (Supplementary materials).  
284 Altogether, our model includes  $5 * 9 * 2 * 250 = 22,500$  compartments (*health –*  
285 *compartments \* age – groups \* risk – groups \* regions*). For transparency, the data and  
286 code are available on GitHub (ref).

287

### 288 **Force of infection and seasonality**

289 The rate at which individuals transmit depends on (i) contact mixing patterns between the infected  
290 individual and his or her contact, (ii) age-specific susceptibility to infection, (iii) region-based  
291 behavioral susceptibility, and (iv) potential seasonal forcing.

292 Age-specific contact rates were parameterized using data from an extensive survey of daily  
293 contacts (35) and data from CBS regarding the household size in each region. In addition, we  
294 utilized the aggregate mobility data regarding movement patterns within and between 250 regions  
295 as observed in the data during routine and following restrictions (Supplementary materials). We  
296 specifically distinguished the contact patterns of infected individuals for different locations,  
297 namely, at home, at work and during leisure, such that the number of contacts was based on (35)  
298 and the household size, whereas the mixing patterns were based on the locations of the individuals  
299 as analyzed by the mobile data. These contact data reveal frequent mixing between similar age  
300 groups, moderate mixing between children and people their parents' age, and infrequent mixing  
301 among other groups. The data based on mobility reveal more frequent mixing between individuals  
302 of similar SES, at similar geographical distances, and with cultural similarities (Supplementary  
303 materials).

304 We distinguished between in-home and out-of-home transmission. We evaluated the in-home  
305 transmission is independent of age, and based on a previous retrospective studies, that suggested



306 a value of 0.16 (11). The age-specific susceptibility rate for out-of-home individuals  $\beta_j$  was  
307 parameterized by calibrating our model with daily COVID-19 records.

308 To account for behavioral susceptibility, we explicitly considered in our model a parameter  
309 reflecting the order to maintain physical distancing,  $\kappa_p$ . The high regional variations in  
310 susceptibility were parameterized based on fertility rates and socioeconomic characteristics.  
311 Specifically, we computed for each region the relative change in mobility compared to routine.  
312 Our analysis indicated that for regions of low SES, the change was lower, which was reflected in  
313 our model by higher susceptibility (Supplementary materials). The use of regional fertility and  
314 relative change in mobility allowed us to refrain from calibrating the model to an excessive number  
315 of unknown parameters and avoid overfitting.

316 Seasonal patterns have been observed in common circulating HCoVs, mostly causing infections  
317 in humans between December and May in the Northern Hemisphere (36). The two human  
318 coronaviruses 229 E and OC43 show distinct winter seasonality. In addition, many coronaviruses  
319 in animals exhibit a distinct seasonal pattern of incidence in their natural hosts (37). There is  
320 growing evidence that SARS-CoV-2 is also seasonal, with the optimal setting for transmission in  
321 Israel occurring during winter (38). Thus, we considered in our base-case seasonal forcing by  
322 including general seasonal variation in the susceptibility rate of the model as

$$323 \quad T(t) = \left(1 + \cos\left(\frac{2\pi(t+\varphi)}{365}\right)\right),$$

324 in which  $\varphi$  is the seasonal offset. This formulation was previously shown to capture the seasonal  
325 variations in several respiratory infections, including RSV and influenza (33, 39). We incorporated  
326 the possible values of  $\varphi$  to reflect peaks from December through February (Supplementary  
327 materials).

### 328 **Model calibration**

330 To empirically estimate unknown epidemiological parameters (Table S5, Supplementary  
331 materials), we calibrated our model to daily age-stratified cases of COVID-19 confirmed by PCR  
332 tests in 30 districts covering Israel. The calibration was conducted on a 30-district level rather than  
333 in the 250 regions to ensure that there were sufficient time series data points in each location for  
334 each age group. The data were reported by the Israeli Ministry of Health between February and  
335 May and include daily information for the patients, including age, residential zone, underlying  
336 conditions, and clinical outcomes, including hospitalizations and death.

337 Due to the uncertainty regarding the proportion of unreported cases, we calibrated our model to  
338 different scenarios. Specifically, underreporting is affected by testing policy and testing

339 capabilities for each country, as well as individuals' tendency to seek care once clinical symptoms  
340 appear. In addition, underreporting is affected by the severity of the infection, which is associated  
341 with age (10). Thus, we chose different estimates for the proportion of underreporting, ranging  
342 from 5.5-14 unreported cases for a single reported case. These estimates are based on observations  
343 from screenings conducted in Denmark, Czechia, Netherlands; Santa Clara, California (10, 16, 40)  
344 (Table S1, Supplementary materials). Due to the uncertainty related to positive predictive values  
345 of serological screenings, we also tested a scenario of 2 unreported cases for a single reported case  
346 to confirm the robustness of our findings.

347 To account for the age variation, we considered the detailed serological data from Santa Clara. We  
348 also calibrated our model with scenarios assuming different phases of seasonal peaking between  
349 December 21 and February 21, as well as scenarios with no seasonality. The final transmission  
350 model included five parameters without constraints imposed from previous data: reduced  
351 susceptibility due to physical distancing  $\kappa_p$  and susceptibility rate based on age groups  $j$ : 0-19, 20-  
352 39, 40-59, and >60 (Supplementary materials).

### 353 **Model simulations**

354 We evaluated the effectiveness of temporal lockdown strategies in reducing mortality by  
355 simulating the model for one year and three years or until disease elimination. The minimal time  
356 chosen is consistent with estimates determined by the US National Institute of Allergy and  
357 Infectious Diseases, which suggested that a vaccine could be available by May 2021.

358 Each strategy considered includes a threshold for activation of a lockdown, and the groups  
359 considered for lockdown were as follows: 1) the entire population in the region, 2) daycare- and  
360 school-age children between 0-19 years of age (children), 3) high-risk groups and individuals >65  
361 years of age (high-risk).

362 Thus, to model the lockdown strategies, we defined an indicator for each region as the weekly  
363 number of new-reported cases per 10,000 people. Each week, we examined whether the indicator  
364 exceeds a certain threshold for each region. If so, a lockdown was activated for the following week.  
365 This process was continued for 1-3 years.

366 To project the number of individuals who will die under each strategy considered, we utilized  
367 available detailed information from the Israeli Ministry of Health (Table S2, Supplementary  
368 materials). Specifically, we calculated for each age and risk group the proportion of individuals  
369 who died out of the reported cases. We multiplied these proportions with the daily model  
370 projections of newly reported cases and summed this product to calculate the total projected  
371 number of deaths. We also accounted for the uncertainty regarding the estimated probabilities. We  
372 define the efficiency of a lockdown strategy as the total number of deaths averted per total

373 lockdown days. The number of deaths averted is calculated as the projected number of deaths with  
374 no lockdowns minus the number of deaths projected when the considered strategy is applied.

375

376

## 377 References

- 378 1. Coronavirus disease 2019, (available at  
379 [https://www.who.int/emergencies/diseases/novel-coronavirus-](https://www.who.int/emergencies/diseases/novel-coronavirus-2019?gclid=EAIaIQobChMIm_vn_6XN6QIVhPdRCh0CbQI_EAAYASAAEgIa7PD_BwE)  
380 [2019?gclid=EAIaIQobChMIm\\_vn\\_6XN6QIVhPdRCh0CbQI\\_EAAYASAA](https://www.who.int/emergencies/diseases/novel-coronavirus-2019?gclid=EAIaIQobChMIm_vn_6XN6QIVhPdRCh0CbQI_EAAYASAAEgIa7PD_BwE)  
381 [EgIa7PD\\_BwE](https://www.who.int/emergencies/diseases/novel-coronavirus-2019?gclid=EAIaIQobChMIm_vn_6XN6QIVhPdRCh0CbQI_EAAYASAAEgIa7PD_BwE)).
- 382 2. Trip.com COVID-19 Country/Region Entry Restrictions, (available at  
383 <https://www.trip.com/travel-restrictions-covid-19/>).
- 384 3. The Novel Coronavirus - Israel Ministry of Health, (available at  
385 <https://govextra.gov.il/ministry-of-health/corona/corona-virus-en/>).
- 386 4. N. Fernandes, Economic Effects of Coronavirus Outbreak (COVID-19) on  
387 the World Economy. *SSRN Electron. J.* (2020), doi:10.2139/ssrn.3557504.
- 388 5. F. Ahmed, N. Ahmed, C. Pissarides, J. Stiglitz, Why inequality could spread  
389 COVID-19. *Lancet Public Heal.* **5** (2020), p. e240.
- 390 6. N. Chow, K. Fleming-Dutra, R. Gierke, A. Hall, M. Hughes, T. Pilishvili, M.  
391 Ritchey, K. Roguski, T. Skoff, E. Ussery, Preliminary estimates of the  
392 prevalence of selected underlying health conditions among patients with  
393 coronavirus disease 2019 - United States, February 12-March 28, 2020.  
394 *Morb. Mortal. Wkly. Rep.* **69** (2020), pp. 382–386.
- 395 7. P. Brodin, Why is COVID-19 so mild in children? *Acta Paediatr.* **109**, 1082–  
396 1083 (2020).
- 397 8. K. Prem, Y. Liu, T. W. Russell, A. J. Kucharski, R. M. Eggo, N. Davies, S.  
398 Flasche, S. Clifford, C. A. B. Pearson, J. D. Munday, S. Abbott, H. Gibbs, A.  
399 Rosello, B. J. Quilty, T. Jombart, F. Sun, C. Diamond, A. Gimma, K. van  
400 Zandvoort, S. Funk, C. I. Jarvis, W. J. Edmunds, N. I. Bosse, J. Hellewell, M.  
401 Jit, P. Klepac, The effect of control strategies to reduce social mixing on  
402 outcomes of the COVID-19 epidemic in Wuhan, China: a modelling study.  
403 *Lancet Public Heal.* **5**, e261–e270 (2020).
- 404 9. Dr. Anthony Fauci On U.S Efforts To Develop A Coronavirus Vaccine :  
405 NPR, (available at [https://www.npr.org/2020/05/22/860682211/dr-anthony-](https://www.npr.org/2020/05/22/860682211/dr-anthony-fauci-on-u-s-efforts-to-develop-a-coronavirus-vaccine)  
406 [fauci-on-u-s-efforts-to-develop-a-coronavirus-vaccine](https://www.npr.org/2020/05/22/860682211/dr-anthony-fauci-on-u-s-efforts-to-develop-a-coronavirus-vaccine)).
- 407 10. F. Zhou, T. Yu, R. Du, G. Fan, Y. Liu, Z. Liu, J. Xiang, Y. Wang, B. Song,  
408 X. Gu, L. Guan, Y. Wei, H. Li, X. Wu, J. Xu, S. Tu, Y. Zhang, H. Chen, B.  
409 Cao, Clinical course and risk factors for mortality of adult inpatients with  
410 COVID-19 in Wuhan, China: a retrospective cohort study. *Lancet.* **395**,  
411 1054–1062 (2020).
- 412 11. W. Li, B. Zhang, J. Lu, S. Liu, Z. Chang, P. Cao, X. Liu, P. Zhang, Y. Ling,  
413 K. Tao, J. Chen, The characteristics of household transmission of COVID-19,  
414 doi:10.1093/cid/ciaa450/5821281.
- 415 12. V. Charu, S. Zeger, J. Gog, O. N. Bjørnstad, S. Kissler, L. Simonsen, B. T.  
416 Grenfell, C. Viboud, Human mobility and the spatial transmission of

- 417 influenza in the United States. *PLOS Comput. Biol.* **13**, e1005382 (2017).
- 418 13. D. Yamin, A. Gavius, E. Solnik, N. Davidovitch, R. D. Balicer, A. P.  
419 Galvani, J. S. Pliskin, An Innovative Influenza Vaccination Policy: Targeting  
420 Last Season's Patients. *PLoS Comput. Biol.* (2014),  
421 doi:10.1371/journal.pcbi.1003643.
- 422 14. F. Finger, T. Genolet, L. Mari, G. Constantin De Magny, N. Magloire  
423 Manga, A. Rinaldo, E. Bertuzzo, Mobile phone data highlights the role of  
424 mass gatherings in the spreading of cholera outbreaks. *PNAS.* **113**, 6421–  
425 6426 (2016).
- 426 15. M. U. G. Kraemer, C. H. Yang, B. Gutierrez, C. H. Wu, B. Klein, D. M.  
427 Pigott, L. du Plessis, N. R. Faria, R. Li, W. P. Hanage, J. S. Brownstein, M.  
428 Layan, A. Vespignani, H. Tian, C. Dye, O. G. Pybus, S. V. Scarpino, The  
429 effect of human mobility and control measures on the COVID-19 epidemic in  
430 China. *Science.* **368**, 493–497 (2020).
- 431 16. E. Bendavid, B. Mulaney, N. Sood, S. Shah, E. Ling, R. Bromley-Dulfano,  
432 C. Lai, Z. Weissberg, R. Saavedra, J. Tedrow, D. Tversky, A. Bogan, T.  
433 Kupiec, D. Eichner, R. Gupta, J. Ioannidis, J. Bhattacharya, *medRxiv*, in  
434 press, doi:10.1101/2020.04.14.20062463.
- 435 17. S. Marcel, A. Christian, N. Richard, S. Silvia, H. Emma, F. Jacques, Z.  
436 Marcel, S. Gabriela, B. Manuel, W.-S. Annelies, E. Matthias, N. Low,  
437 COVID-19 epidemic in Switzerland: on the importance of testing, contact  
438 tracing and isolation, doi:10.4414/smw.2020.20225.
- 439 18. C. Hope, “LOCKDOWN: A FIRST UTILITARIAN ANALYSIS.”
- 440 19. J. T. Wu, K. Leung, K. Leung, M. Bushman, N. Kishore, R. Niehus, P.  
441 M. De Salazar, B. J. Cowling, M. Lipsitch, G. M. Leung, Estimating clinical  
442 severity of COVID-19 from the transmission dynamics in Wuhan, China,  
443 doi:10.1038/s41591-020-0822-7.
- 444 20. T. M. McMichael, D. W. Currie, S. Clark, S. Pogosjans, M. Kay, N. G.  
445 Schwartz, J. Lewis, A. Baer, V. Kawakami, M. D. Lukoff, J. Ferro, C.  
446 Brostrom-Smith, T. D. Rea, M. R. Sayre, F. X. Riedo, D. Russell, B. Hiatt, P.  
447 Montgomery, A. K. Rao, E. J. Chow, F. Tobolowsky, M. J. Hughes, A. C.  
448 Bardossy, L. P. Oakley, J. R. Jacobs, N. D. Stone, S. C. Reddy, J. A.  
449 Jernigan, M. A. Honein, T. A. Clark, J. S. Duchin, Epidemiology of Covid-  
450 19 in a Long-Term Care Facility in King County, Washington. *N. Engl. J.*  
451 *Med.* **382**, 2005–2011 (2020).
- 452 21. S. Bialek, R. Gierke, M. Hughes, L. A. McNamara, T. Pilishvili, T. Skoff,  
453 Coronavirus Disease 2019 in Children — United States, February 12–April  
454 2, 2020. *MMWR. Morb. Mortal. Wkly. Rep.* **69**, 422–426 (2020).
- 455 22. E. Vynnycky, R. White, in *An Introduction to Infectious Disease Modelling*  
456 (2010).

- 457 23. N. A. M. Molinari, I. R. Ortega-Sanchez, M. L. Messonnier, W. W.  
458 Thompson, P. M. Wortley, E. Weintraub, C. B. Bridges, The annual impact  
459 of seasonal influenza in the US: Measuring disease burden and costs. *Vaccine*  
460 (2007), doi:10.1016/j.vaccine.2007.03.046.
- 461 24. A. E. Fiore, A. Fry, D. Shay, L. Gubareva, J. S. Bresee, T. M. Uyeki, Centers  
462 for Disease Control, Antiviral agents for the treatment and chemoprophylaxis  
463 of influenza --- recommendations of the Advisory Committee on  
464 Immunization Practices (ACIP). *MMWR. Surveill. Summ. Morb. Mortal.*  
465 *Wkly. report. Surveill. Summ. / CDC* (2011).
- 466 25. S. A. Lauer, K. H. Grantz, Q. Bi, F. K. Jones, Q. Zheng, H. R. Meredith, A.  
467 S. Azman, N. G. Reich, J. Lessler, The Incubation Period of Coronavirus  
468 Disease 2019 (COVID-19) From Publicly Reported Confirmed Cases:  
469 Estimation and Application. *Ann. Intern. Med.* (2020), doi:10.7326/M20-  
470 0504.
- 471 26. N. M. Linton, T. Kobayashi, Y. Yang, K. Hayashi, A. R. Akhmetzhanov, S.  
472 Jung, B. Yuan, R. Kinoshita, H. Nishiura, Incubation Period and Other  
473 Epidemiological Characteristics of 2019 Novel Coronavirus Infections with  
474 Right Truncation: A Statistical Analysis of Publicly Available Case Data. *J.*  
475 *Clin. Med.* **9**, 538 (2020).
- 476 27. M. Gandhi, D. S. Yokoe, D. V. Havlir, Asymptomatic Transmission, the  
477 Achilles' Heel of Current Strategies to Control Covid-19. *N. Engl. J. Med.*  
478 (2020), doi:10.1056/nejme2009758.
- 479 28. X. He, E. H. Y. Lau, P. Wu, X. Deng, J. Wang, X. Hao, Y. C. Lau, J. Y.  
480 Wong, Y. Guan, X. Tan, X. Mo, Y. Chen, B. Liao, W. Chen, F. Hu, Q.  
481 Zhang, M. Zhong, Y. Wu, L. Zhao, F. Zhang, B. J. Cowling, F. Li, G. M.  
482 Leung, Temporal dynamics in viral shedding and transmissibility of COVID-  
483 19. *Nat. Med.* **26**, 672–675 (2020).
- 484 29. L. Zou, F. Ruan, M. Huang, L. Liang, H. Huang, Z. Hong, J. Yu, M. Kang,  
485 Y. Song, J. Xia, Q. Guo, T. Song, J. He, H. L. Yen, M. Peiris, J. Wu, SARS-  
486 CoV-2 viral load in upper respiratory specimens of infected patients. *N. Engl.*  
487 *J. Med.* **382** (2020), pp. 1177–1179.
- 488 30. S. Zheng, J. Fan, F. Yu, B. Feng, B. Lou, Q. Zou, G. Xie, S. Lin, R. Wang,  
489 X. Yang, W. Chen, Q. Wang, D. Zhang, Y. Liu, R. Gong, Z. Ma, S. Lu, Y.  
490 Xiao, Y. Gu, J. Zhang, H. Yao, K. Xu, X. Lu, G. Wei, J. Zhou, Q. Fang, H.  
491 Cai, Y. Qiu, J. Sheng, Y. Chen, T. Liang, Viral load dynamics and disease  
492 severity in patients infected with SARS-CoV-2 in Zhejiang province, China,  
493 January-March 2020: retrospective cohort study. *BMJ.* **369**, m1443 (2020).
- 494 31. L. Ni, F. Ye, M.-L. Cheng, Y. Feng, Y.-Q. Deng, H. Zhao, P. Wei, J. Ge, M.  
495 Gou, X. Li, L. Sun, T. Cao, P. Wang, C. Zhou, R. Zhang, P. Liang, H. Guo,  
496 X. Wang, C.-F. Qin, F. Chen, C. Dong, Detection of SARS-CoV-2-specific

- 497 humoral and cellular immunity in COVID-19 convalescent individuals.  
498 *Immunity* (2020), doi:10.1016/j.immuni.2020.04.023.
- 499 32. O. W. Ng, A. Chia, A. T. Tan, R. S. Jadi, H. N. Leong, A. Bertoletti, Y. J.  
500 Tan, Memory T cell responses targeting the SARS coronavirus persist up to  
501 11 years post-infection. *Vaccine*. **34**, 2008–2014 (2016).
- 502 33. D. Yamin, F. K. Jones, J. P. DeVincenzo, S. Gertler, O. Kobiler, J. P.  
503 Townsend, A. P. Galvani, Vaccination strategies against respiratory syncytial  
504 virus. *Proc. Natl. Acad. Sci. U. S. A.* (2016), doi:10.1073/pnas.1522597113.
- 505 34. S. M. Kissler, C. Tedijanto, E. Goldstein, Y. H. Grad, M. Lipsitch, Projecting  
506 the transmission dynamics of SARS-CoV-2 through the postpandemic  
507 period. *Science* (80-. ). **368**, eabb5793 (2020).
- 508 35. J. Mossong, N. Hens, M. Jit, P. Beutels, K. Auranen, R. Mikolajczyk, M.  
509 Massari, S. Salmaso, G. S. Tomba, J. Wallinga, J. Heijne, M. Sadkowska-  
510 Todys, M. Rosinska, W. J. Edmunds, Social contacts and mixing patterns  
511 relevant to the spread of infectious diseases. *PLoS Med.* (2008),  
512 doi:10.1371/journal.pmed.0050074.
- 513 36. E. R. Gaunt, A. Hardie, E. C. J. Claas, P. Simmonds, K. E. Templeton,  
514 Epidemiology and Clinical Presentations of the Four Human Coronaviruses  
515 229E, HKU1, NL63, and OC43 Detected over 3 Years Using a Novel  
516 Multiplex Real-Time PCR Method. *J. Clin. Microbiol.* **48**, 2940–2947  
517 (2010).
- 518 37. P. Zimmermann, N. Curtis, Coronavirus infections in children including  
519 COVID-19: An overview of the epidemiology, clinical features, diagnosis,  
520 treatment and prevention options in children. *Pediatr. Infect. Dis. J.* **39**  
521 (2020), pp. 355–368.
- 522 38. J. Wang, K. Tang, K. Feng, W. Lv, High Temperature and High Humidity  
523 Reduce the Transmission of COVID-19. *SSRN Electron. J.* (2020),  
524 doi:10.2139/ssrn.3551767.
- 525 39. J. Bock Axelsen, R. Yaari, B. T. Grenfell, L. Stone, Multiannual forecasting  
526 of seasonal influenza dynamics reveals climatic and evolutionary drivers,  
527 doi:10.1073/pnas.1321656111.
- 528 40. (No Title), (available at [https://www.zva.gov.lv/sites/default/files/inline-](https://www.zva.gov.lv/sites/default/files/inline-files/05_07_covid-19-rapid-risk-assessment-coronavirus-disease-2019-ninth-update-23-april-2020-1.pdf)  
529 [files/05\\_07\\_covid-19-rapid-risk-assessment-coronavirus-disease-2019-ninth-](https://www.zva.gov.lv/sites/default/files/inline-files/05_07_covid-19-rapid-risk-assessment-coronavirus-disease-2019-ninth-update-23-april-2020-1.pdf)  
530 [update-23-april-2020-1.pdf](https://www.zva.gov.lv/sites/default/files/inline-files/05_07_covid-19-rapid-risk-assessment-coronavirus-disease-2019-ninth-update-23-april-2020-1.pdf)).
- 531 41. J. Medlock, A. P. Galvani, Optimizing influenza vaccine distribution. *Science*  
532 (80-. ). (2009), doi:10.1126/science.1175570.
- 533 42. M. L. Ndeffo Mbah, J. Medlock, L. A. Meyers, A. P. Galvani, J. P.  
534 Townsend, Optimal targeting of seasonal influenza vaccination toward  
535 younger ages is robust to parameter uncertainty. *Vaccine* (2013),  
536 doi:10.1016/j.vaccine.2013.04.052.

- 537 43. L. Bao, W. Deng, H. Gao, C. Xiao, J. Liu, J. Xue, Q. Lv, J. Liu, P. Yu, Y.  
538 Xu, F. Qi, Y. Qu, F. Li, Z. Xiang, H. Yu, S. Gong, M. Liu, G. Wang, S.  
539 Wang, Z. Song, W. Zhao, Y. Han, L. Zhao, X. Liu, Q. Wei, C. Qin, *bioRxiv*,  
540 in press, doi:10.1101/2020.03.13.990226.
- 541 44. A. P. G. M. M. Designed Research; S, Projecting hospital utilization during  
542 the COVID-19 outbreaks in the United States. **117**, 9122–9126 (2020).
- 543 45. S. M. Kissler, C. Tedijanto, E. Goldstein, Y. H. Grad, M. Lipsitch,  
544 Supplementary Materials for Projecting the transmission dynamics of SARS-  
545 CoV-2 through the postpandemic period, doi:10.1126/science.abb5793.
- 546 46. D. F. Gudbjartsson, A. Helgason, H. Jonsson, O. T. Magnusson, P. Melsted,  
547 G. L. Norddahl, J. Saemundsdottir, A. Sigurdsson, P. Sulem, A. B.  
548 Agustsdottir, B. Eiriksdottir, R. Fridriksdottir, E. E. Gardarsdottir, G.  
549 Georgsson, O. S. Gretarsdottir, K. R. Gudmundsson, T. R. Gunnarsdottir, A.  
550 Gylfason, H. Holm, B. O. Jenson, A. Jonasdottir, F. Jonsson, K. S.  
551 Josefsdottir, T. Kristjansson, D. N. Magnusdottir, L. le Roux, G.  
552 Sigmundsdottir, G. Sveinbjornsson, K. E. Sveinsdottir, M. Sveinsdottir, E. A.  
553 Thorarensen, B. Thorbjornsson, A. Löve, G. Masson, I. Jonsdottir, A. D.  
554 Möller, T. Gudnason, K. G. Kristinsson, U. Thorsteinsdottir, K. Stefansson,  
555 Spread of SARS-CoV-2 in the Icelandic Population. *N. Engl. J. Med.* (2020),  
556 doi:10.1056/nejmoa2006100.
- 557 47. Czech study shows very low COVID-19 incidence in population, (available  
558 at [https://medicalxpress.com/news/2020-05-czech-covid-incidence-](https://medicalxpress.com/news/2020-05-czech-covid-incidence-population.html)  
559 [population.html](https://medicalxpress.com/news/2020-05-czech-covid-incidence-population.html)).
- 560 48. R. M. Anderson, H. Heesterbeek, D. Klinkenberg, T. D. Hollingsworth, How  
561 will country-based mitigation measures influence the course of the COVID-  
562 19 epidemic? *Lancet*. **395** (2020), pp. 931–934.
- 563 49. G. F. Ficitola, D. Rubolini, *medRxiv*, in press,  
564 doi:10.1101/2020.03.23.20040501.
- 565 50. מִשְׁקֵי בֵּית, נושאים - (available at [https://www.cbs.gov.il/he/subjects/Pages/מִשְׁקֵי-](https://www.cbs.gov.il/he/subjects/Pages/מִשְׁקֵי-בֵּית.aspx)  
566 [בֵּית.aspx](https://www.cbs.gov.il/he/subjects/Pages/מִשְׁקֵי-בֵּית.aspx)).
- 567 51. [www.idi.org.il](http://www.idi.org.il); 2018( בִּישְׂרָאֵל 8102 ). [www.idi.org.il](http://www.idi.org.il);  
568 52. Coronavirus (COVID-19) Data Dashboard - Novel Coronavirus (COVID-19)  
569 - County of Santa Clara, (available at  
570 <https://www.sccgov.org/sites/covid19/Pages/dashboard.aspx>).
- 571 53. Italy Coronavirus: 232,664 Cases and 33,340 Deaths - Worldometer,  
572 (available at <https://www.worldometers.info/coronavirus/country/italy/>).
- 573 54. S. F. Dowell, M. Shang Ho, Seasonality of infectious diseases and severe  
574 acute respiratory syndrome - What we don't know can hurt us. *Lancet Infect.*  
575 *Dis.* **4** (2004), pp. 704–708.
- 576 55. לִידוֹת חַי, נושאים - (available at [https://www.cbs.gov.il/he/subjects/Pages/לִידוֹת-](https://www.cbs.gov.il/he/subjects/Pages/לִידוֹת-חַי)  
[חַי](https://www.cbs.gov.il/he/subjects/Pages/לִידוֹת-חַי)).



577            הי.aspx).  
578    56.    מאגר COVID-19 - מאגרי מידע - Government Data, (available at  
579            <https://data.gov.il/dataset/covid-19>).  
580

581  
582  
583

#### 584    **Acknowledgments**

585  
586

587            **General:** The authors would like to thank Prof. Irad Ben-Gal, Yariv Waits, Moris Suissa,  
588            Dana Pessach, Dganit Meron for their valuable insights on analysis.

589

590            **Funding:** This research was supported by the Israel Science Foundation (grant No.  
591            3409/19) within the Israel Precision Medicine Partnership program. The Zimin Institute  
592            for Engineering Solutions Advancing Better Lives.

593

594            **Author contributions:** DY, MY, AW, IR contributed to the study design, analysis, and  
595            interpretation of the results. ES and SB contributed in providing and interpreting the raw  
596            data. DY wrote the first draft of the manuscript. All authors contributed to further  
597            versions of the manuscript. All authors have read and approved the manuscript.

598

599            **Competing interests:** The authors declare that they have no competing interests.

600

601    **Data and materials availability:** The data that support the findings of this study are available  
602    from the authors but restrictions apply to the availability of these data, which were used under  
603    license for the current study and so are not publicly available. Data are however available from  
604    the authors upon reasonable request.

605

606

607 **Figures and Tables**

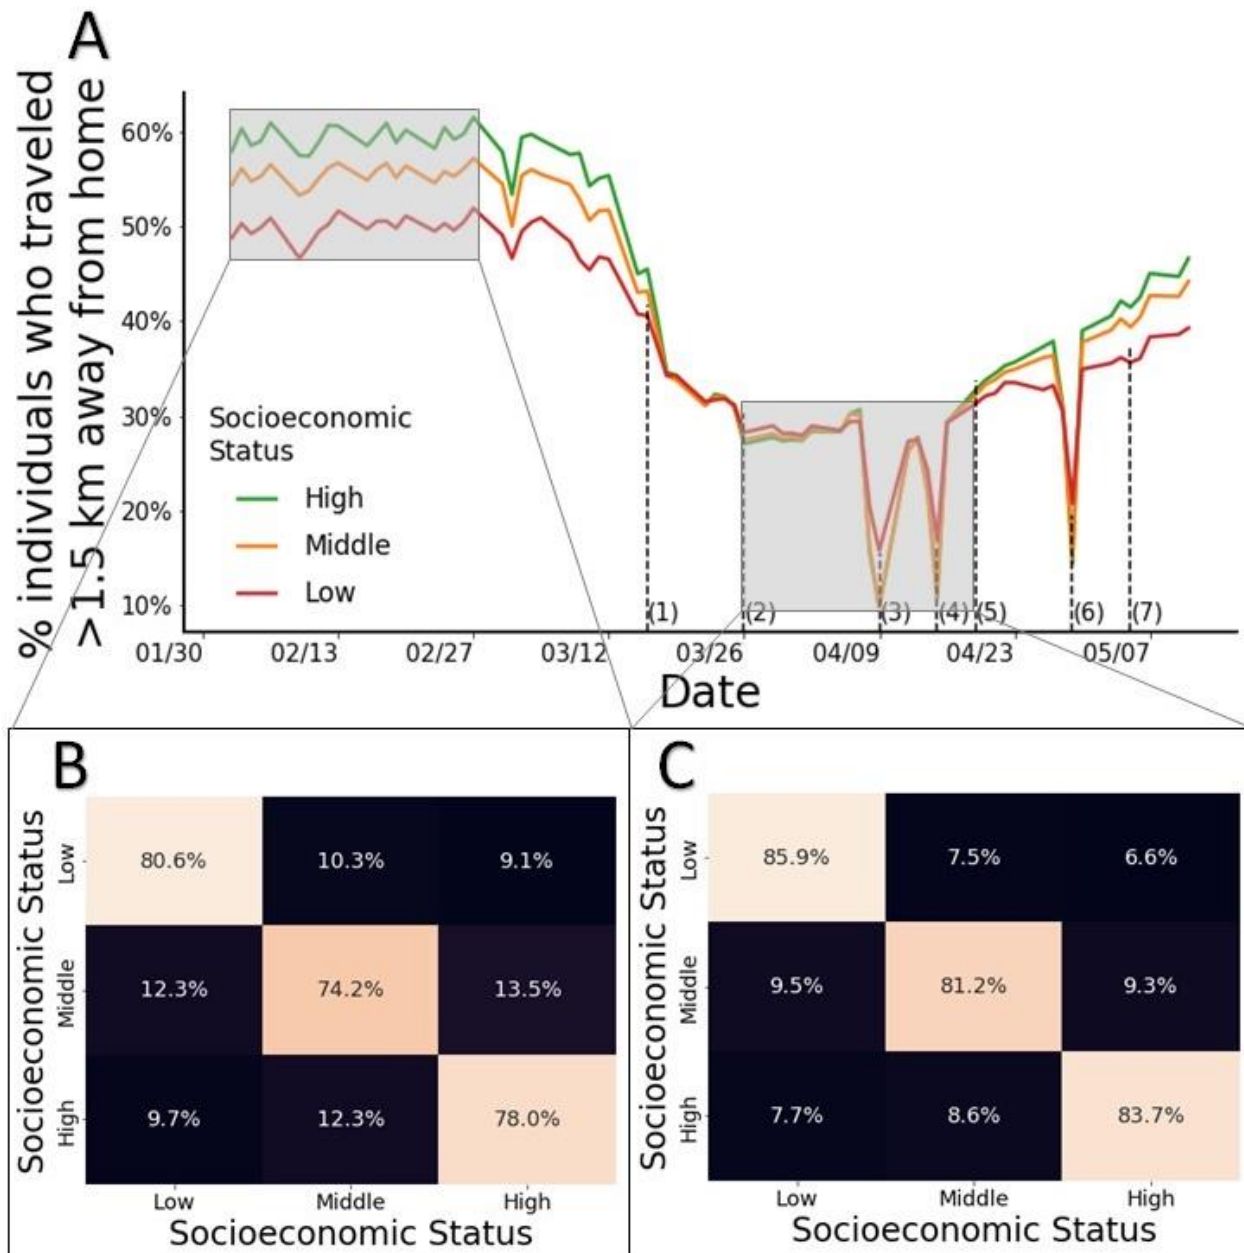

608  
 609 **Figure 1: Mobility patterns with and without restrictions** (A) Percentage of individuals who traveled >1.5km,  
 610 stratified by socioeconomic groups, during routine and when mobility restrictions were applied and lifted: (1) closing  
 611 schools and stores and limiting workplaces to 30% activity; (2) limiting nonessential travels to 100 meters away from  
 612 home; (3) and (4) national daily lockdowns due to Passover; (5) opening stores; (6) lockdown due to Independence  
 613 Day; (7) lifting the 100 meter limit for nonessential travels. (B) and (C) Travel patterns based on individuals' SES  
 614 during February 2-29 (B) and March 26-April 18 (C).  
 615

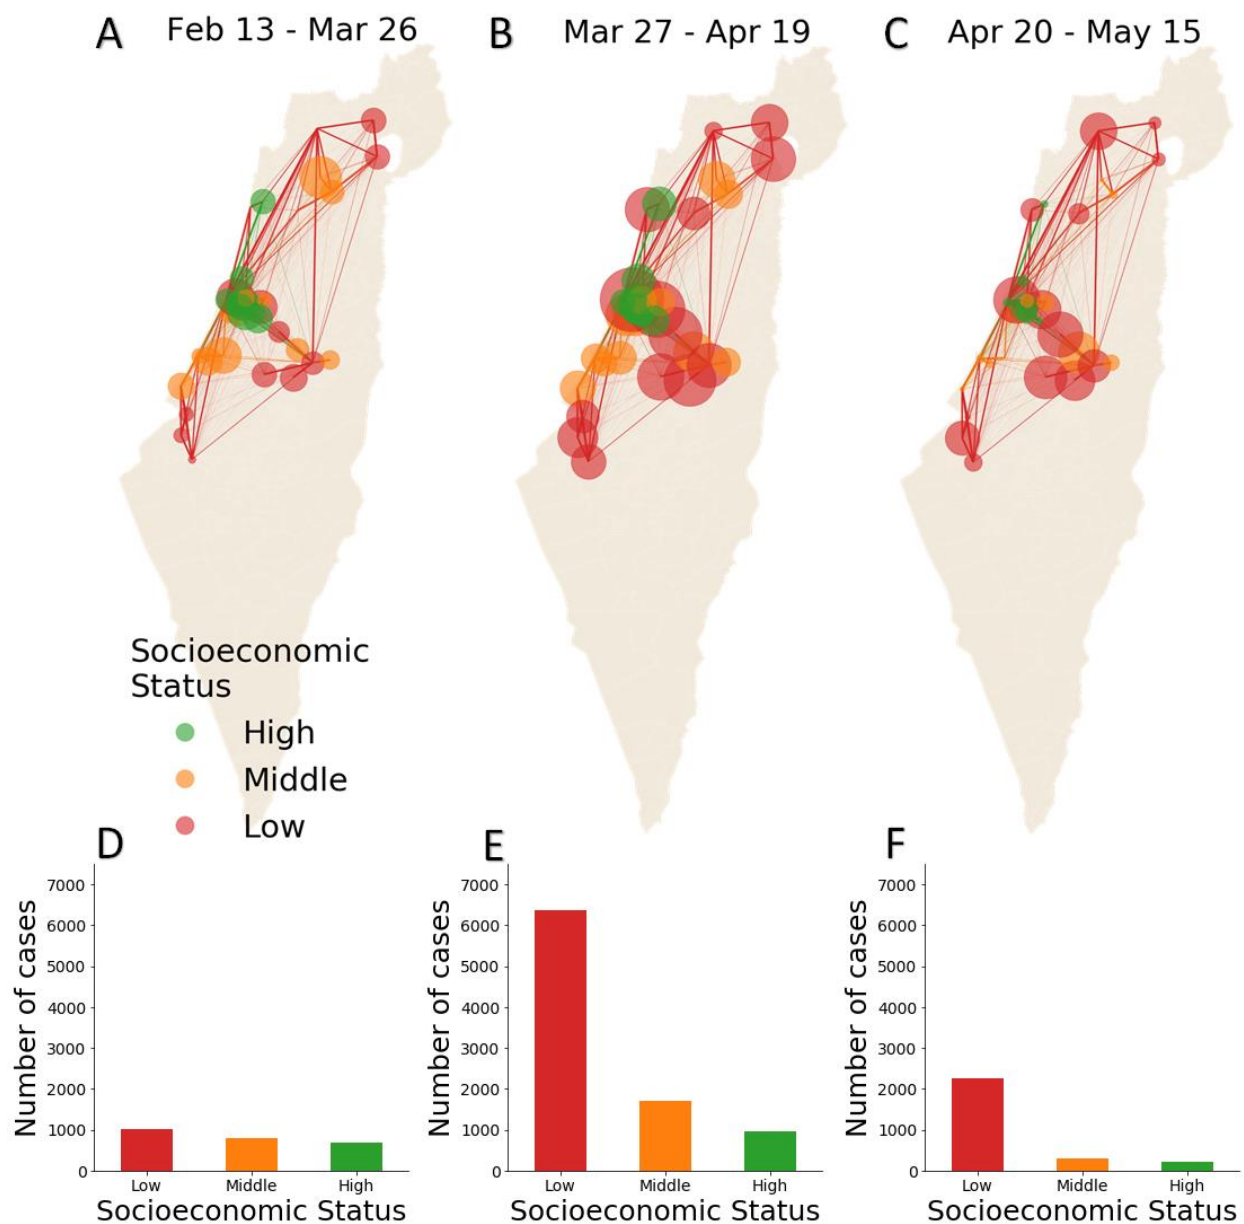

616

617

618 **Figure 2. Association between mobility and poverty in COVID-19 transmission.** (A-C) Spatiotemporal  
619 transmission by socioeconomic status. We present the 50 municipalities with the highest incidence. Each circle  
620 represents one municipality. The radius (presented on a logarithmic scale for clarity) reflects the total number of new  
621 cases reported during the corresponding period. The colors reflect socioeconomic status. The lines between the  
622 municipalities represent the traffic of each municipality, wherein the line thickness represents the relative traffic  
623 intensity and the color matches the color of the SES of origin. (D-E) The number of reported cases among different  
624 SEGs for three periods corresponding to 1) the early phase before restrictions started, 2) from the time of restrictions  
625 and until the restrictions were lifted, and 3) after restrictions were lifted.

626

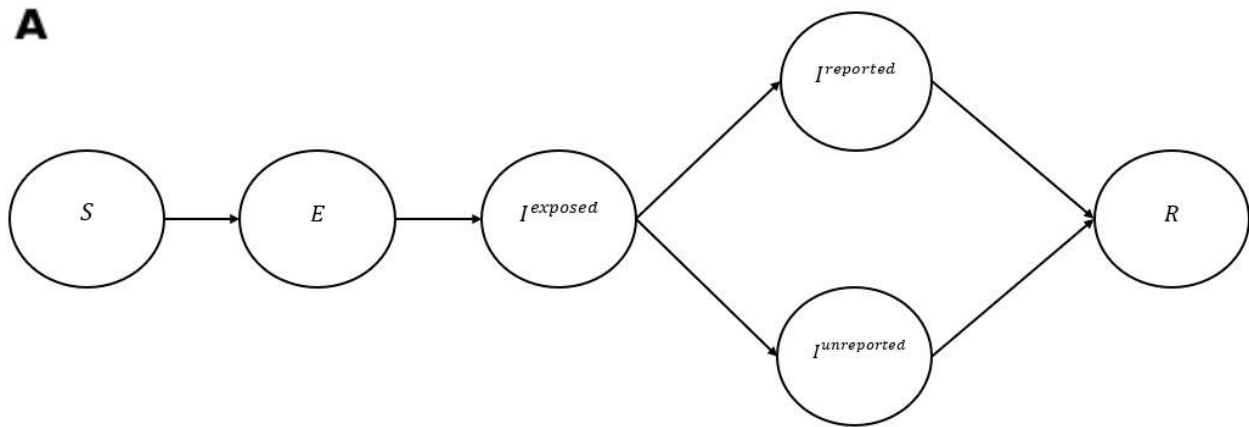

627

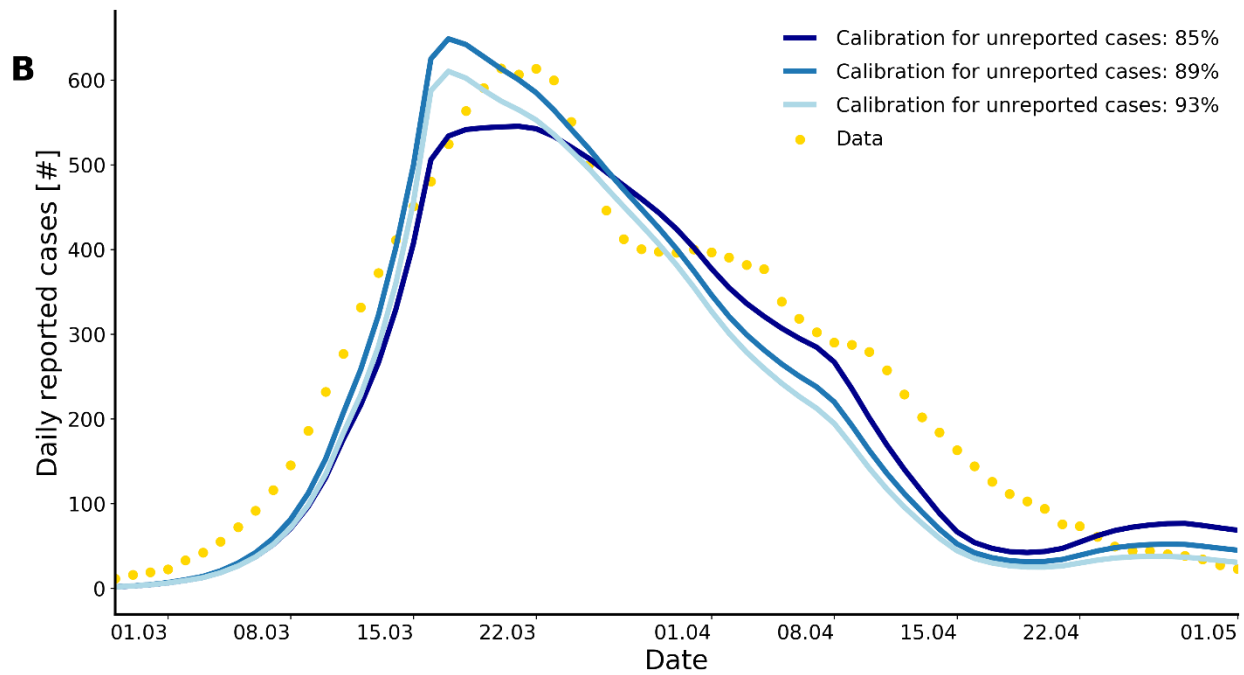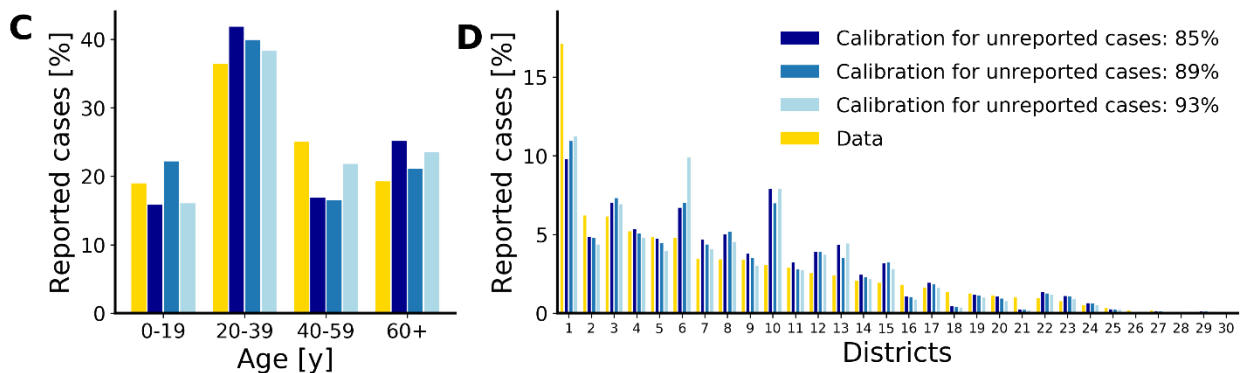

628

629

630 **Figure 3. Structure and fit of the transmission model.** (A) Compartmental diagram of the transmission model.

631 Susceptible individuals  $S$  transition to the exposed compartment with a force of infection  $\lambda$ , where they are infected

632 but not yet infectious, until moving to an early infectious compartment at rate  $\sigma$ , in which they do not show symptoms

633 but may transmit. Infected individuals in the early stage move to a reported  $I^{Reported}$  or unreported  $I^{Unreported}$

634 infectious period, in which they may have a mild or an asymptomatic infection until death or complete recovery. For

clarity of depiction, age, risk, and location stratifications are not displayed. (B) Time series of reported daily COVID

635 cases and model fit countrywide. (C) Data and model fit to the age distribution among COVID19 infections. (D) Data  
 636 and model fit to the 30 districts covering Israel.  
 637

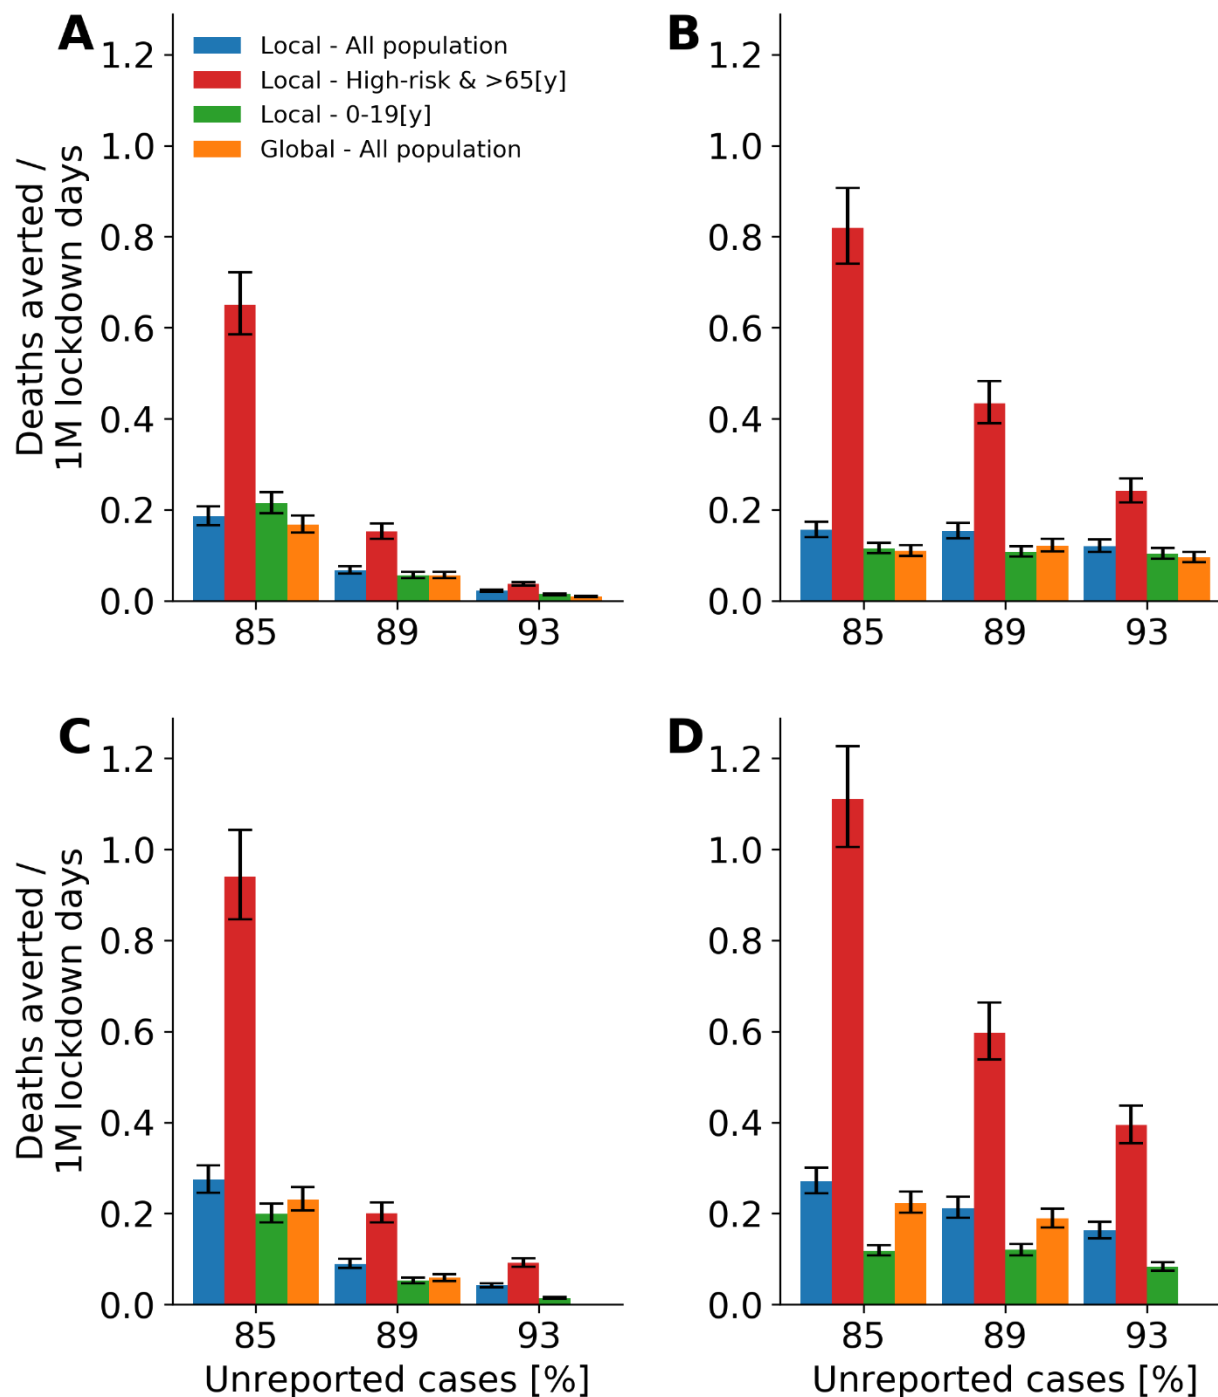

638  
 639 **Figure 4. Efficiency of lockdown strategies.** Median and interquartile values of the projected number of deaths  
 640 averted per 1 M lockdown days due to the implementation of lockdown strategies (A,C) after one year and (B, D)  
 641 after three years. (A,B) The thresholds for lockdowns in a local region are 1/10,000 [cases/individuals] and (C,D)  
 642 5/10,000 [cases/individuals].  
 643

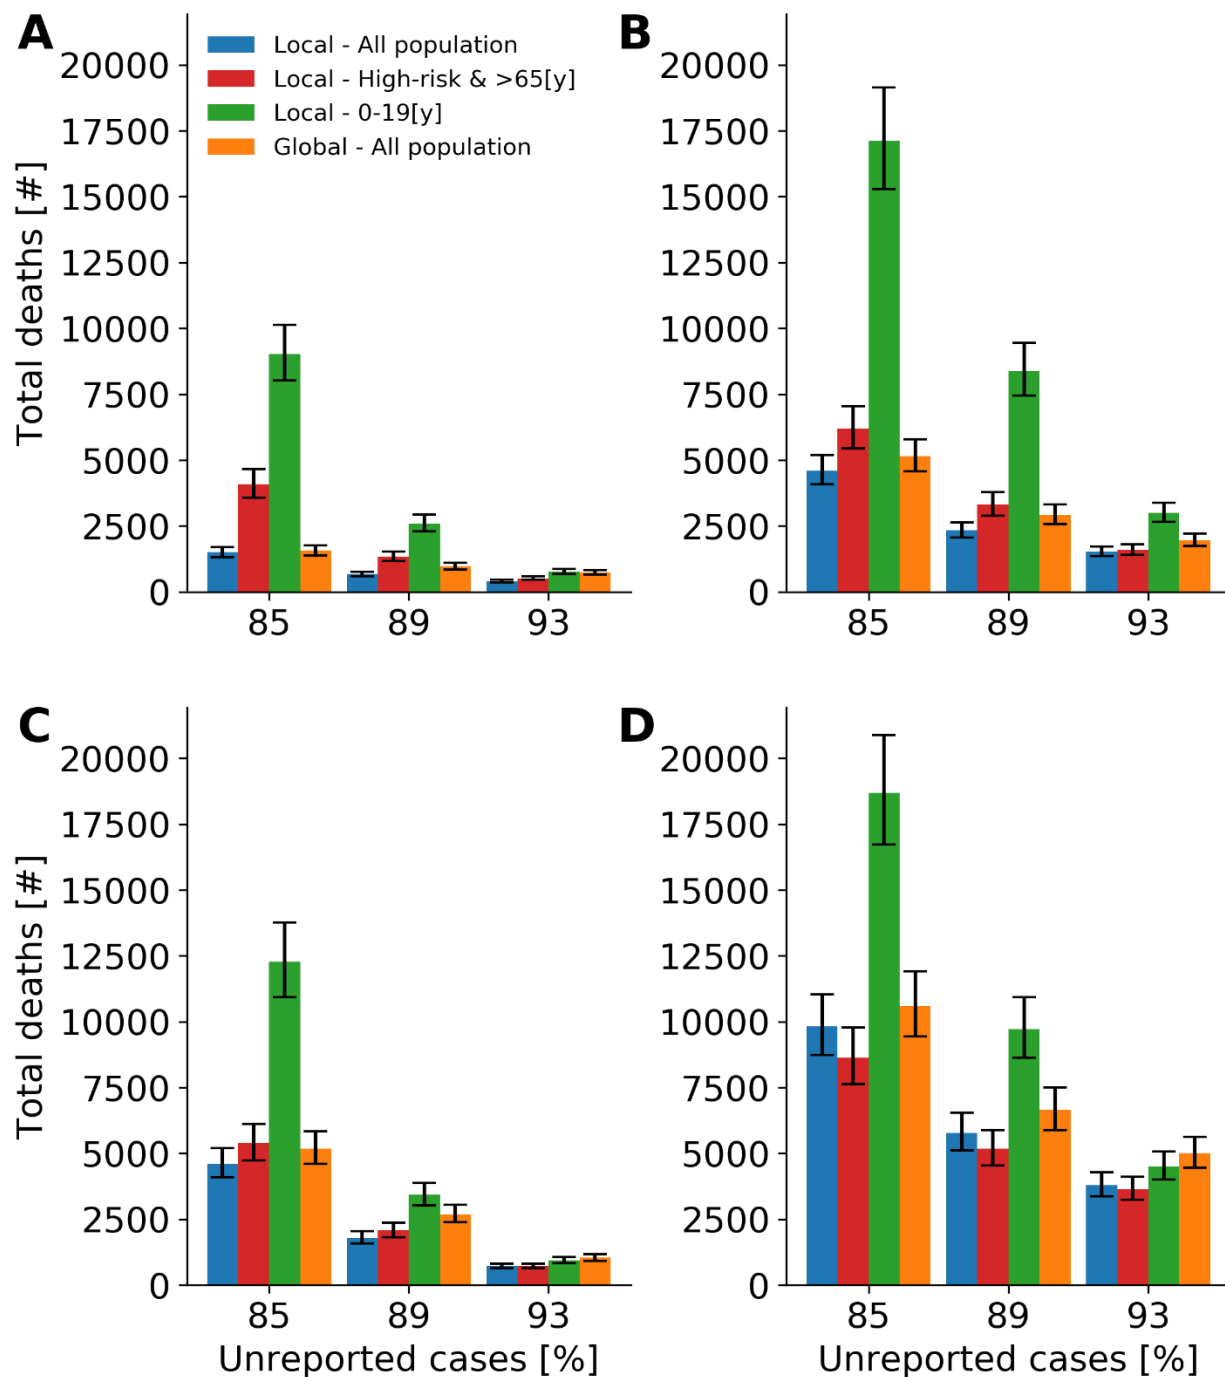

644  
645  
646  
647  
648  
649  
650

**Figure 5. Effectiveness of lockdown strategies.** Median and interquartile values of the projected number of deaths after implementation of strategies (A, C) after one year and (B, D) after three years. (A, B) The thresholds for lockdowns in a local region are 1/10,000 [cases/individuals] and (C, D) 5/10000 [cases/individuals].

651 **Supplementary material for: Human mobility and poverty as key factors in**  
652 **strategies against COVID-19**  
653 Matan Yechezkel\*, Amit Weiss\*, Idan Rejwan\*, Edan Shahmoon, Shachaf Ben-Gal, Dan Yamin  
654 Laboratory for Epidemic Modeling and Analysis, Department of Industrial Engineering, Faculty of  
655 Engineering, Tel Aviv University, Tel Aviv 69978, Israel  
656 \* contributed equally  
657  
658

## 659 Table of Content

|     |                                          |    |
|-----|------------------------------------------|----|
| 660 | 1. Model.....                            | 24 |
| 661 | 1.1. The model.....                      | 24 |
| 662 | 1.2. Model transitioning.....            | 25 |
| 663 | 1.3. Force of infection .....            | 26 |
| 664 | 2. Fixed parameters .....                | 28 |
| 665 | 2.1. Contact mixing patterns .....       | 28 |
| 666 | 2.2. Relative reduction in travels ..... | 32 |
| 667 | 2.3. Epidemiological parameters.....     | 33 |
| 668 | 3. Calibrated parameters.....            | 36 |
| 669 | 4. Further simulation results.....       | 39 |
| 670 |                                          |    |
| 671 |                                          |    |
| 672 |                                          |    |

673

## 674 1. Model

### 675 1.1. The model

676

677 We developed a dynamic model for age-, risk- and regions-stratified SARS-Cov-2 infection  
678 progression and transmission in Israel. Our model is a modified Susceptible-Exposed-Infected-  
679 Recovered (SEIR) compartmental framework (22), whereby the population is stratified into health-  
680 related compartments, and transitions between the compartments occurs over time (Main text,  
681 Figure 3). To model age-dependent transmission, we stratified the population into nine age groups:  
682 0–4 years, 5-9 years, 10-19 years, 20-29 years, 30-39 years, 40-49 years, 50-59 years, 60-69 years  
683 and  $\geq 70$  years. (13, 41, 42). We distinguished between high-risk and low-risk individuals for each  
684 age group based on the ACIP case definition (23, 24). We also distinguish in the model between  
685 250 regions covering Israel.

686

687 Multiple infections with SARS-Cov-2 is yet fully understood. A recent study indicated that there  
688 is a protective immunity following infection in humans (31) and animals (43). This result is in-  
689 line with a previous study indicating that for SARS-Cov-1, Memory T cells persist for up to 11  
690 years (32). In addition, similarly to other respiratory infections, it is likely that if re-infection  
691 occurs, it is less severe and less transmissible (33). Thus, we assumed that upon recovery  
692 individuals are fully protected for the entire season which is consistent with other SARS-COV-2 (44,  
693 45).

694 The mean incubation period of SARS-Cov-2 is 6.4 days (95% CI, 5.6 to 7.7 days) (25, 26), but  
695 first evidence shows viral shedding occurs during a pre-symptomatic stage (27, 28). Thus, we  
696 considered an exposed period  $E$ , and an early infectious period  $I^{exposed}$ . Underreporting arises  
697 from asymptomatic cases or mild cases of individuals that do not seek care (16, 40, 46, 47). Thus,  
698 following the early infectious phase, individuals in the model transition either to an infectious and  
699 reported compartment  $I^{reported}$ , or to infectious and unreported compartment  $I^{unreported}$ .

700 To enable in our model for a subset of the population to go for intervention (e.g., 30% of the  
701 individuals from specific regions, age groups or risk-group to go under lockdown during a selected  
702 time period), we also specifically distinguish between those who undergo and those who did not  
703 undergo an intervention.

704 Accordingly, we stratified the population into six health-related compartments:  
705 susceptible  $S_{j,k,r,q}(t)$ , exposed but not yet infectious  $E_{j,k,r,q}(t)$ , infectious at early  
706 stage  $I_{j,k,r,q}^{exposed}(t)$ , reported infectious  $I_{j,k,r,q}^{reported}(t)$ , unreported infectious  $I_{j,k,r,q}^{unreported}(t)$  and  
707 recovered  $R_{j,k,r,q}(t)$ , such that at any given time  $t$  (in days) the population is fixed and scaled to  
708 one. Namely,



$$\sum_j \sum_k \sum_r \sum_q [S_{j,k,r,q}(t) + E_{j,k,r,q}(t) + I_{j,k,r,q}^{exposed}(t) + I_{j,k,r,q}^{reported}(t) + I_{j,k,r,q}^{unreported}(t) + R_{j,k,r,q}(t)] = \sum_j \sum_k \sum_r \sum_q N_{j,k,r,q} = 1, \quad (1)$$

709 where the index  $j \in \{0 - 4y, 5 - 10y, \dots, > 70y\}$  represents the age-group of each individual,  
 710 index  $k \in \{1, 2, \dots, 250\}$  specifies the home region of each individual, index  $r \in \{L, H\}$  specifies  
 711 the risk-group of each individual (i.e. High-risk, or low-risk) and index  $q \in$   
 712  $\{intervention, non - intervention\}$  represent the intervention-group of each individual.

713

## 714 1.2. Model transitioning

715

716 Susceptible individuals  $S_{j,k,r,q}(0)$ , transition to the exposed compartment  $E_{j,k,r,q}(t)$ , with force of  
 717 infection  $\lambda_{j,k,q}(t)$ , depending on their age-group  $j$  home region-group  $k$  and their intervention-  
 718 group  $q$ . At this compartment individuals are infected but not yet infectious until they move at rate  
 719  $\sigma$  to an infectious compartment  $I_{j,k,r,q}^{exposed}(t)$ , where they are at the early stage of the infectious  
 720 period. Infected individuals at early stage of their infectious period, then move at rate  $\delta$  to the late  
 721 infectious period, where they can become to a unreported case (having non to mild symptoms)  
 722 with probability  $f_{j,r}$  which results in transition to  $I_{j,k,r,q}^{unreported}(t)$ . With probability of  $(1 - f_{j,r})$   
 723 they can become to a reported case (having moderate to severe symptoms), which results in  
 724 transition to  $I_{j,k,r,q}^{reported}(t)$ . After infectious period, individuals' transition into the recovered  
 725 compartment at rate  $\gamma$ ,  $R_{j,k,r,q}(t)$ ,. (See Section, 2.3 Epidemiological parameters). We also  
 726 consider a function of the initial spreaders with time  $\varepsilon_{j,k,r}(t)$ , that reflects the individuals exposed  
 727 to the virus the entered Israel from overseas between February 21 2020 - and March 9, 2020. Thus,  
 728 the transmission model is composed of the following system of difference equations:

$$S_{j,k,r,q}(t) = S_{j,k,r,q}(t-1) - \lambda_{j,k,q}(t) \cdot S_{j,k}(t-1),$$

$$E_{j,k,r,q}(t) = E_{j,k,r,q}(t-1) + \lambda_{j,k,q}(t) \cdot S_{j,k}(t-1) - \sigma \cdot E_{j,k,r,q}(t-1) + \varepsilon_{j,k,r,q}(t),$$

$$I_{j,k,r,q}^{exposed}(t) = I_{j,k,r,q}^{exposed}(t-1) + \sigma \cdot E_{j,k,r,q}(t-1) - \delta \cdot I_{j,k,r,q}^{exposed}(t-1),$$

$$I_{j,k,r,q}^{reported}(t) = I_{j,k,r,q}^{reported}(t-1) + (1 - f_{j,r})\delta \cdot I_{j,k,r,q}^{exposed}(t-1) - \gamma \cdot I_{j,k,r,q}^{reported}(t-1),$$

$$I_{j,k,r,q}^{unreported}(t) = I_{j,k,r,q}^{unreported}(t-1) + f_{j,r}\delta \cdot I_{j,k,r,q}^{exposed}(t-1) - \gamma \cdot I_{j,k,r,q}^{unreported}(t-1), \quad (2)$$

$$R_{j,k,r,q}(t) = R_{j,k,r,q}(t-1) + \gamma \cdot \left( I_{j,k,r,q}^{reported}(t-1) + I_{j,k,r,q}^{unreported}(t-1) \right),$$

with initial conditions:

$$S_{j,k,r,q}(0) = N_{j,k,r,q}.$$

$$E_{j,k,r,q}(0) = I_{j,k,r,q}^{exposed}(0) = I_{j,k,r,q}^{reported}(0) = I_{j,k,r,q}^{unreported}(0) = R_{j,k,r,q}(0) = 0.$$

729

### 730 1.3. Force of infection

731 The rate at which individuals transmit SARS-Cov-2 at time  $t$  is  $\lambda_{j,r,q}(t)$ . This rate depends on the  
 732 combination of (i) contact mixing patterns between an infected individual and his or her contacts,  
 733 (ii) age-specific susceptibility to infection, (iii) region-based behavioral susceptibility, and (iv) a  
 734 potential seasonal forcing.

735

736 We incorporate age- and region-specific contact patterns between individuals, represented by  
 737 contact rate between an infected individual in age-group  $i$ , region-group  $l$  and each of their contacts  
 738 with susceptible in age-group  $j$ , region-group  $k$ , for different locations: at home, at work and during  
 739 leisure, for each day  $t$  denoted by  $C_{(l,i),(k,j)}^{\tau}(t)$ , such that  $i\tau \in \{Home, Work, Leisure\}$ , is the  
 740 location index of the contact location index. The contact matrix  $C_{(l,i),(k,j)}^{\tau}(t)$  is detailed in section

741 2.1 Contact mixing patterns.

742

743 We distinguish between in-home versus out-of-home transmission. Consistent with a previous  
 744 study (8), we assume the in-home transmission to be fixed and independent of age,  $\beta_{Home}$ . (See  
 745 Section 2.3 Epidemiological parameters). To account for the reduced probability of infection in  
 746 house following a recovery of other house members, we multiple the susceptibility inside  
 747 household,  $\beta_{Home}$ , by decay function  $\psi_k(t) = \frac{S_k(t-1)}{S_k(0)}$ . This function serve as an unbiased estimator

748 to the proportion of susceptible individuals in the house Age-specific susceptibility rate for  
 749 individuals out-of-home  $\beta_j$ , was parameterized by calibrating our model with daily COVID-19  
 750 records (See Section 3. calibrated parameters).

751  
 752 To account for behavioral susceptibility, we explicitly considered in our model a parameter  
 753 reflecting the order to maintain physical distancing,  $\kappa_p$ , as vast number of countries, including  
 754 Israel, adopted measures such as physical-distancing to control the susceptibility of SARS-Cov-2  
 755 (48). This parameter was calibrated to the epidemiological data of COVID-19 in Israel. Moreover,  
 756 the high regional variations in susceptibility were parameterized based on fertility rates and  
 757 socioeconomic characteristics relative to the national average, using the data from Central Bureau  
 758 of Statistics (CBS),  $\alpha_k$ . Specifically, we computed for each region the relative reduction in travels  
 759  $>1.5$  km compared to routine  $M_{j,k,q}$ (See Section 2.2 Relative reduction in travels). Our analysis  
 760 indicated that for regions of low SES the change was lower, which was reflected by our model  
 761 with higher susceptibility.

762  
 763 Seasonal patterns have been observed in common circulating HCoVs, mostly causing infections  
 764 in humans between December and May in the Northern Hemisphere (37). The two human  
 765 coronaviruses 229 E and OC43 show distinct winter seasonality. In addition, many coronaviruses  
 766 in animals do exhibit a distinct seasonal pattern of incidence in their natural hosts (36). There is  
 767 growing evidence that SARS-CoV-2 is also seasonal, with the optimal setting for transmission in  
 768 Israel during winter (38, 49). Thus, we considered in our base-case seasonal forcing by including  
 769 general seasonal variation in the susceptibility rate of the model as

$$T(t) = 1 + \cos\left(\frac{2\pi(t + \phi)}{365}\right). \quad (3)$$

770  
 771 in which  $\phi$  is seasonal offset. This formulation was previously shown to capture the seasonal  
 772 variations of several respiratory infections including RSV and influenza (33, 39). We incorporated  
 773 possible values of  $\phi$  to reflect peak from December thru February (See Section 2.3  
 774 Epidemiological parameters).

775 Taken together, the force of infection  $\lambda_{j,k,q}(t)$  is given by

$$\lambda_{j,k,q}(t) = M_{j,k,q} \cdot \kappa_k \cdot T(t) \cdot \left( \beta_{home} \cdot \psi_k(t) \cdot \sum_i \sum_l \sum_p C_{(l,i),(k,j)}^{Home}(t) \sum_r \left( I_{j,k,r,p}^{exposed}(t-1) + I_{j,k,r,p}^{reported}(t-1) + I_{j,k,r,p}^{unreported}(t-1) \right) \right) \quad (4)$$

$$1) + \beta_j \cdot \alpha_k \cdot \left[ \sum_i \sum_l \sum_p \sum_{\tau \in \{Work, Leisure\}} C_{(l,i),(k,j)}^\tau(t) \sum_r \left( I_{j,k,r,p}^{exposed}(t-1) + I_{j,k,r,p}^{reported}(t-1) + I_{j,k,r,p}^{unreported}(t-1) \right) \right]$$

776

## 777 2. Fixed parameters

778

### 779 2.1. Contact mixing patterns

780 At the core of the transmission model lies the contact mixing patterns between a susceptible  
781 individual and infectious individual  $C_{(l,i),(r,j)}^\tau(t)$ . Similar to a previous study (8), the contact  
782 matrices depends on the age-group and region of residency for the susceptible individual  $(l, i)$ , the  
783 age group and region of residency for an infectious individual  $(r, j)$  at location  $\tau \in$   
784  $\{Home, Work, Leisure\}$  on day  $t$ . Here we detail the process of how we conducted the contact-  
785 mixing.

786

#### 787 *Household contacts*

788 We estimated the contact mixing at home for each region based on the average household size and  
789 its age distribution from the Israeli Central Bureau of Statistics (CBS) (50, 51). We assume all  
790 individuals in the same household will meet with each other daily regardless of the control  
791 measures applied by the country (e.g. lockdowns). The CBS data suggest that low socioeconomic  
792 status is characterized by larger and younger household size.

793

#### 794 *Work and leisure contact patterns*

##### 795 *Age-specific contacts*

796 We parametrized the age-specific contact rates using data from a survey of daily contacts collected  
797 in eight European countries (35). This contact data includes contact rates for different locations:  
798 works (or school for children  $<10$ ), leisure. In addition, the data exhibits frequent mixing between  
799 similar age-groups, moderate mixing between children and adults in their thirties (likely their  
800 parents), and infrequent mixing between other groups. To generate the age-specific contact mixing  
801 used in our model, we used the means of each age-group over the eight countries. To ensure the  
802 matrices is symmetric and convert between age-groups used in the survey to those used in our  
803 model, we adjusted the contact matrices according to the means for reciprocal age group pairing  
804 (33).

805

##### 806 *Origin-destination from mobility data*

807

808 Our data includes mobility records based on cellular data of  $>3$  million users from one of the  
809 largest telecommunication companies in Israel. The data specifies movement patterns within and  
810 between 2,630 zones covering Israel, on an hourly basis, from February 1, 2020, and until May  
811 16, 2020. To ensure privacy, if in a given hour less than 50 individuals are identified in the zone,  
812 the number of reported individuals is set to zero. We determined the location of individuals based  
813 on the triangulation of cell towers, which was found accurate to 300 meters in most cases but

814 varied to 1 km in less populated areas. We defined users as residents of a zone based on location  
815 in which they had the highest number of signals on most nights during February 2020.

816  
817 We used this data to develop aggregated origin-destination (OD) matrices between and within  
818 zones. To refrain from signal noises and identify stay points, we track only locations where users  
819 stayed for at least 15 minutes within a distance threshold of 1.7 km. The OD matrices serve as a  
820 proxy to the flow from each region to another.

821  
822 Next, we integrated data from the Central Bureau of Statistics (CBS) that specifies for each zone  
823 several socioeconomic characteristics, including population size, household size, age distribution,  
824 socioeconomic score, and dominant religion. Each zone includes ~3,500 residents. For each zone,  
825 we scaled the number of resident users of the telecommunication company to match with the actual  
826 number of residents in the zone, as recorded by the Israeli CBS. Grouping the zones by SES, and  
827 scaling for each zone the daily number of travels to one, we created an origin-destination traveling  
828 probability matrix. We found that the population is clustered, such that people of specific SES are  
829 more likely to travel to zones of the same SES during routine and even more likely during  
830 movement restrictions. These findings remain consistent when partitioning the population into  
831 resolution of 10 socioeconomic clusters, comprising the different SESs. Additionally, a similar  
832 phenomenon is observed when partitioning the population by Religious Affiliations to Arab,  
833 orthodox and non-orthodox Jewish, and also for the combination of both religious affiliation and  
834 socioeconomic clusters (Figures S1 and S2).

835

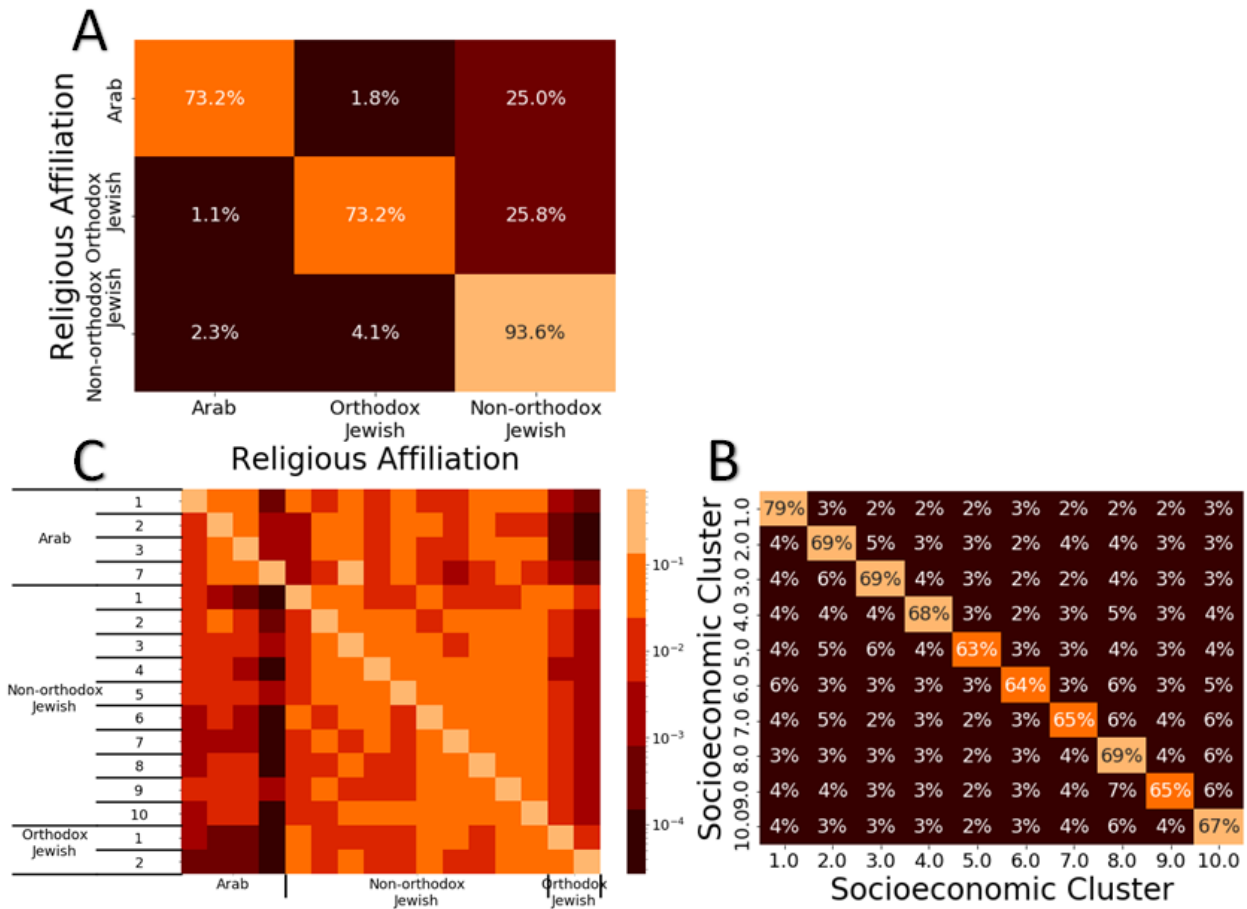

836  
837  
838

**Figure S1. Traveling patterns during routine.** Traveling patterns during February 2-29 based on (A) religious affiliation, (B) socioeconomic status, and (C) religious affiliation and socioeconomic status

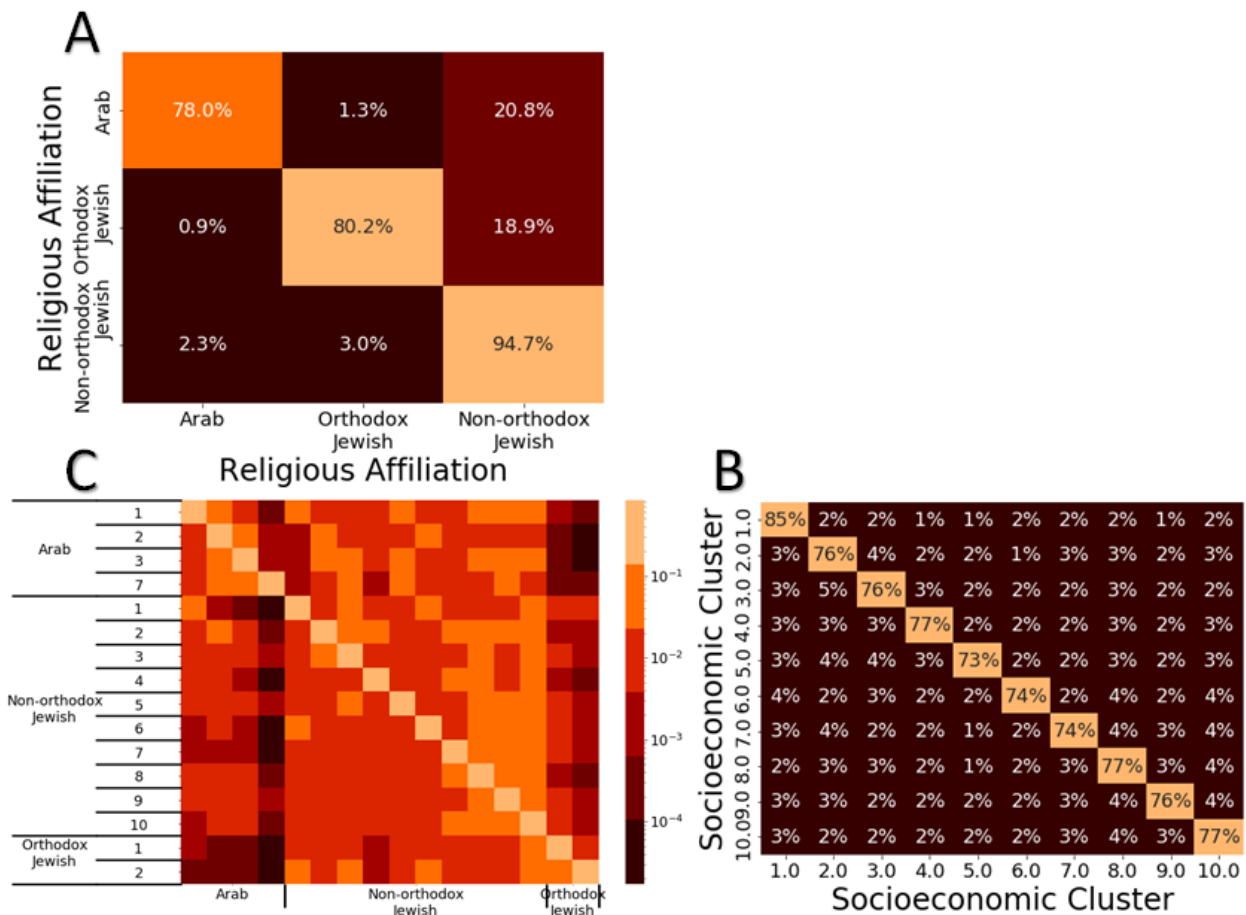

839  
840 **Figure S2. Traveling patterns during COVID-19 outbreak.** Traveling patterns during March 26-April 18 based  
841 on (A) religious affiliation, (B) socioeconomic status, and (C) religious affiliation and socioeconomic status  
842

843 We used this data to develop two aggregated origin-destination (OD) matrices between and within  
844 regions from during work time 08:01-17:00 and leisure time 17:01-23:00. To incorporate the time  
845 depended travels following restrictions periods and routine we developed the two OD for the  
846 following periods: February 21 – March 13, March 14 – March 16, March 17 – March 25, March  
847 26 – April 2, April 3 – April 6, April 7 – April 16, April 17 – May 4, May 5 – May 11.  
848

849 To integrate the age-specific contact matrices and the OD matrices we multiplied the number of  
850 contacts for each age-group by the travel distribution for each region in the OD matrices. We  
851 assumed that at work, children at the age of 0-9 years old, remains at their home region. We also  
852 assumed that at leisure time children at the age of 0-9 years old movement patterns are like their  
853 parents.  
854  
855  
856

857

858 2.2. Relative reduction in travels

859 For each region, we computed the relative reduction in travels >1.5 km  $M_{j,k,q}$ . This measure was  
 860 done scaling the daily proportion of travels more than 1.5 km out-of-home.

861 
$$\frac{MI(t) - \min_t(MI(t))}{\max_t(MI(t)) - \min_t(MI(t))}$$

862 To compute this minimal and maximal values and refrain from outliers, we averaged the three  
 863 minimal and three maximal values. This measure was found to be highly correlative with disease  
 864 growth factor ranging between 79.2-82.8% (p value<0.001) for a shift of 12-14 days (Figure S3).  
 865 Thus, we incorporated for each region this measure in the model.  
 866

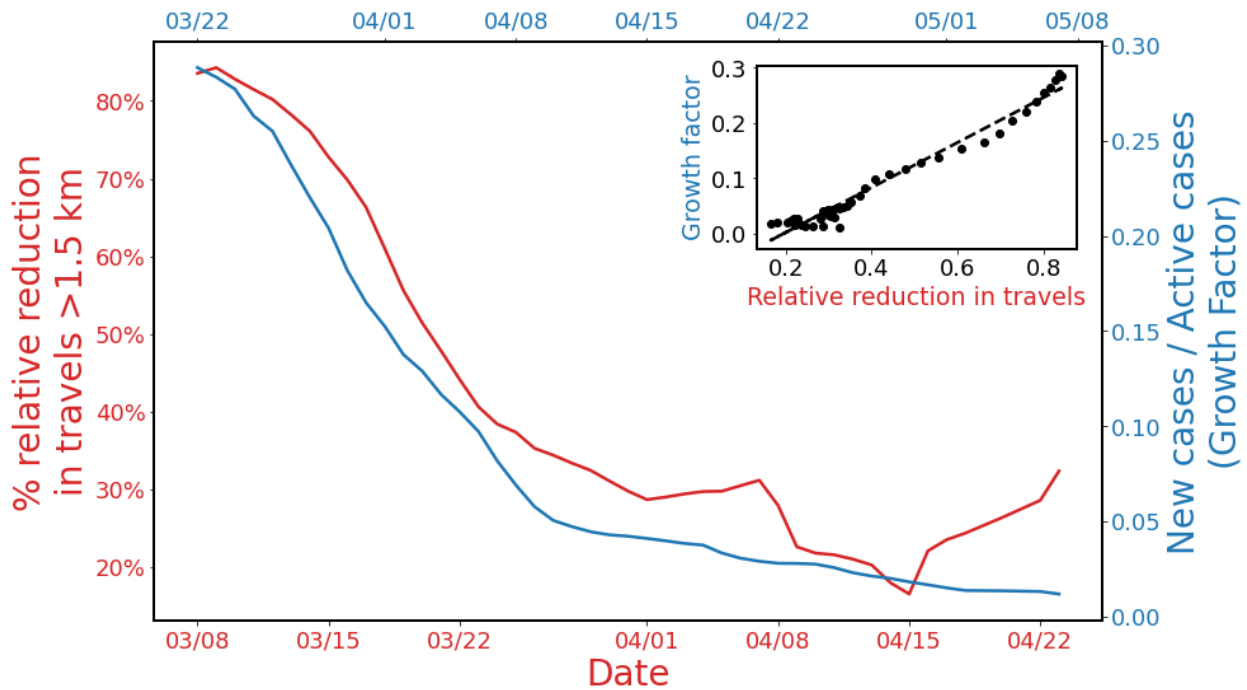

867  
 868 **Figure S3: Mobility ahead of transmission.** Percentage relative reduction in travels from home between March 8  
 869 and April 22 (red) and new cases per active cases between March 22 and May 8 (blue). Both plots show the weekly  
 870 average. The correlation between the two is 97.0% (inserted graph).  
 871  
 872  
 873  
 874  
 875



876

877

878 2.3. Epidemiological parameters

879

880 *Unreported cases*

881 Under reporting arises from asymptomatic cases or mild cases of individuals that do not seek for  
 882 care. The severity of SARS-Cov-2 infection is associated with age- and risk- group (10). In  
 883 addition, underreporting is affected by testing policy and testing-capabilities for each country, as  
 884 well as the tendency of individuals to seek for care once clinical symptoms appear. PCR or  
 885 serological screenings have yet to be conducted in Israel. Thus, we evaluated unreported cases  
 886 based on PCR and serological screenings from the Czech Republic, Denmark, and Santa Clara,  
 887 California, and Iceland. Similarly, to Israel, as to May 14<sup>th</sup>, 2020 these countries are characterized  
 888 with high rates of testing and low number of severe cases. In addition, hospitals were not  
 889 overwhelmed. Serological screenings from the Czech Republic suggested that each reported case  
 890 corresponds to ~5.5 unreported cases (40, 47), whereas estimates from Santa Clara suggested at  
 891 least 14 unreported cases for each single reported case (16). Taken together we chose to present  
 892 estimates of unreported ratios 1:5.5 (Scenario A), 1:9 (Scenario B), and 1:14 (Scenario C). It is not  
 893 clear how much reutilizing antibodies are sufficient to ensure protection, and thus it is possible  
 894 serological screenings serve as over estimation to determine exposure. Thus, to determine the  
 895 robustness of our findings, we also considered an extreme scenario of 1:2 (Scenario D).

896 We estimated the proportion of under reporting for each age-group by scaling the estimates from  
 897 Santa-Clara Study to the age reported cases in this region (52). This analysis suggested that  
 898 younger age-groups are more likely to be unreported. Conservatively, we assumed that all cases  
 899 among individuals at high-risk are reported. Using these estimates and based on the reported cases  
 900 in Israel between February 20<sup>th</sup> - May 14<sup>th</sup>, 2020, we obtained that overall proportion of unreported  
 901 cases is 85% for scenario A, 89% for scenario B, 93% for scenario C and 69% for scenario D.

902 **Table S1: proportion of unreported cases.** proportion of unreported cases among individuals at high risk and low  
 903 risk stratified by age and overall reported cases based on the reported cases observed in Israel between February 20  
 904 and May 14, 2020.

| <b>Scenario</b> | <b>Risk \ Age</b> | <b>0-19</b> | <b>20-64</b> | <b>≥65</b> |
|-----------------|-------------------|-------------|--------------|------------|
| <b>A</b>        | <b>Low</b>        | 0.97        | 0.85         | 0.68       |
|                 | <b>High</b>       | 0.97        | 0.85         | 0.68       |
|                 | <b>Total</b>      | 0.85        |              |            |
| <b>B</b>        | <b>Low</b>        | 0.95        | 0.89         | 0.80       |
|                 | <b>High</b>       | 0.95        | 0.89         | 0.80       |
|                 | <b>Total</b>      | 0.89        |              |            |
| <b>C</b>        | <b>Low</b>        | 0.99        | 0.93         | 0.84       |
|                 | <b>High</b>       | 0.99        | 0.93         | 0.84       |
|                 | <b>Total</b>      | 0.93        |              |            |
| <b>D</b>        | <b>Low</b>        | 0.92        | 0.67         | 0.43       |
|                 | <b>High</b>       | 0.92        | 0.67         | 0.43       |

---

|              |      |
|--------------|------|
| <b>Total</b> | 0.69 |
|--------------|------|

---

905

906 *Case fatality*

907 The probability of death for each age-and risk-group given a reported case was evaluated based on  
 908 the Israeli Ministry of Health case report data (Table S2).

909 **Table S2: Probability of death for each age-and risk-group given a reported case.**

| Age-<br>group | Risk-<br>group | Base-case<br>value | Distribution        |
|---------------|----------------|--------------------|---------------------|
| <b>0-19</b>   | <b>High</b>    | 0                  |                     |
| <b>20-59</b>  | <b>High</b>    | 0.89%              | <i>Beta(4,410)</i>  |
| <b>60-69</b>  | <b>High</b>    | 1.48%              | <i>Beta(5,312)</i>  |
| <b>≥ 70</b>   | <b>High</b>    | 12.03%             | <i>Beta(52,378)</i> |
| <b>0-19</b>   | <b>Low</b>     | 0                  |                     |
| <b>20-59</b>  | <b>Low</b>     | 0.06%              | <i>Beta(5,7759)</i> |
| <b>60-69</b>  | <b>Low</b>     | 1.06%              | <i>Beta(11,995)</i> |
| <b>≥ 70</b>   | <b>Low</b>     | 11.33%             | <i>Beta(95,741)</i> |

---

910

911 *Initial morbidity(aboard)*

912 The initial morbidity in Israel was imported by 491 citizens who returned from overseas. The first  
 913 infected traveler identified on February 20, and by March 9<sup>th</sup> ,2020 a self-quarantine was  
 914 mandatory for all returning. Most of the flights to Israel arrive from the developed countries. Thus,  
 915 we distributed the these cases in each day of the 18 days proportionally to the daily new cases in  
 916 Italy, which had the hardest hit among developed countries (53). To account for under reporting,  
 917 we multiplied the number of cases in each day according to the unreported scenarios we considered  
 918 (Table S1). We entered these initial spreaders,  $\varepsilon_{j,k,r,i}(t)$ , to the exposed compartment.

919

920 *Susceptibility at-home*

921 We distinguish between in-home versus out-of-home transmission. Consistent with a previous  
 922 study (8). We specifically distinguish between the susceptibility of those settings. We estimated  
 923 the in-home susceptibility rate,  $\beta_{home}$  , based on a previous study that showed a secondary attack  
 924 rate of 16.3% throughout the entire infectious period (11).

925

926 **Table S3: Fixed parameters used in the transmission model.**

| Parameter                   | Description                                                                                                                                                                                                          | Value                                                                                                        | Reference |
|-----------------------------|----------------------------------------------------------------------------------------------------------------------------------------------------------------------------------------------------------------------|--------------------------------------------------------------------------------------------------------------|-----------|
| $N_{j,k,r,q}$               | Population size of risk-group $r$ age-group $j$ in region $k$                                                                                                                                                        | Varies between regions                                                                                       | (23)      |
| $\frac{1}{\sigma}$          | Mean duration of exposed period                                                                                                                                                                                      | 4.1 days                                                                                                     | (25)      |
|                             |                                                                                                                                                                                                                      |                                                                                                              | (26)      |
|                             |                                                                                                                                                                                                                      |                                                                                                              | (28)      |
|                             |                                                                                                                                                                                                                      |                                                                                                              | (27)      |
| $\frac{1}{\delta}$          | Mean duration of early infectious period                                                                                                                                                                             | 2.3 days                                                                                                     | (25)      |
|                             |                                                                                                                                                                                                                      |                                                                                                              | (26)      |
|                             |                                                                                                                                                                                                                      |                                                                                                              | (28)      |
|                             |                                                                                                                                                                                                                      |                                                                                                              | (27)      |
| $f_{j,r}$                   | Unreported probabilities                                                                                                                                                                                             | Table S1                                                                                                     | (10)      |
|                             |                                                                                                                                                                                                                      |                                                                                                              | (16)      |
|                             |                                                                                                                                                                                                                      |                                                                                                              | (46)      |
| $\varphi$                   | Seasonal phase                                                                                                                                                                                                       | December 21<br>( $\varphi = 60$ ),<br>January 21<br>( $\varphi = 29$ ),<br>February 21<br>( $\varphi = 0$ ). | (36)      |
|                             |                                                                                                                                                                                                                      |                                                                                                              | (45)      |
|                             |                                                                                                                                                                                                                      |                                                                                                              | (38)      |
|                             |                                                                                                                                                                                                                      |                                                                                                              | (49)      |
|                             |                                                                                                                                                                                                                      |                                                                                                              | (54)      |
| $\frac{1}{\gamma}$          | Mean duration of late infectious period (in reported and unreported cases)                                                                                                                                           | 7 days                                                                                                       | (28)      |
| $C_{(l,i),(r,j)}^{\tau}(t)$ | Contact rate between an infected individual in age-group $i$ , region-group $l$ and each of their contacts with susceptible in age-group $j$ , region-group $k$ , for different location $\tau$ , for each day $t$ . |                                                                                                              | (35)      |
|                             |                                                                                                                                                                                                                      |                                                                                                              | (41)      |
|                             |                                                                                                                                                                                                                      |                                                                                                              | (50)      |
|                             |                                                                                                                                                                                                                      |                                                                                                              | (51)      |
| $\alpha_k$                  | Fertility rate for each region $k$ relative to the nation's mean.                                                                                                                                                    |                                                                                                              | (55)      |
|                             |                                                                                                                                                                                                                      |                                                                                                              | (51)      |

|                |                                                                        |          |      |
|----------------|------------------------------------------------------------------------|----------|------|
| $\rho_{j,r}$   | Probability of death for each age-and risk-group given a reported case | Table S2 | (56) |
| $\beta_{home}$ | In-home susceptibility rate                                            | 0.018    | (11) |

927

### 928 3. Calibrated parameters

929

930 To estimate empirically unknown epidemiological parameters, we calibrated our model to daily  
 931 age-stratified cases of COVID-19 confirmed by PCR tests in 30 districts covering Israel between  
 932 March 1 until May 10. We shifted the data 11 days backward, to compensate for the lag between  
 933 the date of infection and the date of first positive SARS-CoV2 test result, which was found to be  
 934 10.5 days on average according to MOH’s epidemiological investigations. We applied a central  
 935 moving average with window of three days before and after the data point, on the data to reduce  
 936 noise caused by weekly patterns.

937 The calibration was conducted on a 30 sub-district level rather than 250 regions to ensure there are  
 938 sufficient time-series data points in each location for each age group. The stratification is based on  
 939 the 16 formal districts, which we further stratified such that the sub districts will be homogenous  
 940 in terms of their SES and religious affiliation (Table S4). To calibrate the model to the incidence data,  
 941 we maximized the likelihood assuming a normal distribution of the error between model predictions and  
 942 incidence data. This was achieved by using the truncated Newton (TNC) algorithm. We calibrated the  
 943 model for 16 different scenarios of unreported cases and seasonal forcing. The final transmission model  
 944 included five parameters without constraints imposed from previous data: reduced susceptibility  
 945 due to physical distancing  $\kappa_p$ , and susceptibility rate based on age-groups  $j$ : 0-19, 20-39, 40-59,  
 946 and >60 (Table S5).

947 We used an F-test of equality of variances to compare between models 1) with vs. without  
 948 consideration of seasonal forcing, 2) with and without consideration of human mobility, 3) with  
 949 and without consideration of regional fertility. We denote that in all three comparisons, the number  
 950 of calibrated parameters is constant and equal to five. Our tests suggested that models that do not  
 951 include the mobility data (p.value<0.01), and the regional fertilities (p.value<0.01) were  
 952 significantly worse. We also found that models that accounted for seasonal forcing yielded higher,  
 953 but not significant (p value<0.35), likelihood than models that did not account for the seasonal  
 954 forcing.

955

956 **Table S4: 30 sub-districts calibrated.**

| Sub-district number | Name | Population Size |
|---------------------|------|-----------------|
|---------------------|------|-----------------|

|    |                                      |         |
|----|--------------------------------------|---------|
| 1  | Jerusalem and sub.                   | 778,503 |
| 2  | Bet Shemesh                          | 120,164 |
| 3  | Jerusalem and sub. (Orthodox Jewish) | 265,313 |
| 4  | Zefat                                | 138,618 |
| 5  | Zefat (Israeli Arabs)                | 23,772  |
| 6  | Kinneret (Jewish)                    | 98,178  |
| 7  | Jezreel Valley (Israeli Arabs)       | 159,112 |
| 8  | Jezreel Valley (Jewish)              | 351,446 |
| 9  | Akko (Israeli Arabs)                 | 357,341 |
| 10 | Akko (Jewish)                        | 314,607 |
| 11 | Ramat Hagolan                        | 51,980  |
| 12 | Haifa (Israeli Arabs)                | 35,637  |
| 13 | Haifa (Jewish)                       | 589,951 |
| 14 | Hadera (Israeli Arabs)               | 115,000 |
| 15 | Hadera (Jewish)                      | 315,593 |
| 16 | Sharon (Israeli Arabs)               | 85,729  |
| 17 | Sharon (Jewish)                      | 412,638 |
| 18 | Petah Tiqwa (Israeli Arabs)          | 27,455  |
| 19 | Petah Tiqwa (Orthodox Jewish)        | 49,549  |
| 20 | Petah Tiqwa (Secular Jewish)         | 680,836 |
| 21 | Ramla                                | 323,352 |
| 22 | Rehovot                              | 661,079 |
| 23 | Tel Aviv – Yafo                      | 820,271 |
| 24 | Bnei Brak                            | 211,259 |
| 25 | Tel Aviv suburbs                     | 464,974 |
| 26 | Ashqelon                             | 559,556 |
| 27 | Beer Sheva (Israeli Arabs)           | 196,311 |
| 28 | Beer Sheva (Jewish)                  | 504,831 |
| 29 | Judea and Samaria                    | 267,832 |
| 30 | Judea and Samaria (Orthodox Jewish)  | 155,095 |

957

958

959 Table S5: Calibrated parameters.

| Model configuration | Seasonal forcing peak | Unreported [%] | Physical distancing Coefficient $\kappa_{physical}$ | Susceptibility among age-group 0-19[y] $\beta_{0-19}$ | Susceptibility among age-group 20-39[y] $\beta_{20-39}$ | Susceptibility among age-group 40-59[y] $\beta_{40-59}$ | Susceptibility among age-group 60+[y] $\beta_{60+}$ | Likelihood of calibration to data $-\log(L)$ |
|---------------------|-----------------------|----------------|-----------------------------------------------------|-------------------------------------------------------|---------------------------------------------------------|---------------------------------------------------------|-----------------------------------------------------|----------------------------------------------|
| Full model          | No-seasonality        | 69             | 0.248                                               | 0.094                                                 | 0.054                                                   | 0.042                                                   | 0.311                                               | -25.766                                      |
| Full model          | No-seasonality        | 85             | 0.232                                               | 0.119                                                 | 0.053                                                   | 0.052                                                   | 0.166                                               | -25.743                                      |
| Full model          | No-seasonality        | 89             | 0.234                                               | 0.057                                                 | 0.076                                                   | 0.047                                                   | 0.116                                               | -25.494                                      |
| Full model          | No-seasonality        | 93             | 0.246                                               | 0.119                                                 | 0.036                                                   | 0.054                                                   | 0.184                                               | -25.876                                      |
| Full model          | December 21           | 69             | 0.272                                               | 0.038                                                 | 0.023                                                   | 0.020                                                   | 0.128                                               | -25.856                                      |
| Full model          | December 21           | 85             | 0.306                                               | 0.044                                                 | 0.021                                                   | 0.024                                                   | 0.109                                               | -25.862                                      |
| Full model          | December 21           | 89             | 0.355                                               | 0.025                                                 | 0.021                                                   | 0.025                                                   | 0.144                                               | -25.998                                      |
| Full model          | December 21           | 93             | 0.274                                               | 0.058                                                 | 0.015                                                   | 0.023                                                   | 0.083                                               | -25.917                                      |
| Full model          | January 21            | 69             | 0.364                                               | 0.043                                                 | 0.025                                                   | 0.024                                                   | 0.151                                               | -25.835                                      |
| Full model          | January 21            | 85             | 0.420                                               | 0.049                                                 | 0.027                                                   | 0.024                                                   | 0.148                                               | -25.787                                      |
| Full model          | January 21            | 89             | 0.349                                               | 0.035                                                 | 0.031                                                   | 0.029                                                   | 0.167                                               | -25.957                                      |
| Full model          | January 21            | 93             | 0.295                                               | 0.059                                                 | 0.020                                                   | 0.030                                                   | 0.112                                               | -25.898                                      |
| Full model          | February 21           | 69             | 0.347                                               | 0.063                                                 | 0.039                                                   | 0.033                                                   | 0.248                                               | -25.822                                      |
| Full model          | February 21           | 85             | 0.464                                               | 0.051                                                 | 0.036                                                   | 0.034                                                   | 0.199                                               | -25.813                                      |
| Full model          | February 21           | 89             | 0.417                                               | 0.052                                                 | 0.045                                                   | 0.041                                                   | 0.229                                               | -25.916                                      |
| Full model          | February 21           | 93             | 0.411                                               | 0.100                                                 | 0.030                                                   | 0.034                                                   | 0.157                                               | -25.827                                      |
| Without mobility    | January 21            | 85             | 0.127                                               | 0.022                                                 | 0.035                                                   | 0.022                                                   | 0.162                                               | -25.129                                      |
| Without mobility    | January 21            | 89             | 0.133                                               | 0.031                                                 | 0.029                                                   | 0.022                                                   | 0.133                                               | -25.206                                      |
| Without mobility    | January 21            | 93             | 0.098                                               | 0.049                                                 | 0.030                                                   | 0.023                                                   | 0.121                                               | -25.139                                      |
| Without fertility   | January 21            | 85             | 0.633                                               | 0.056                                                 | 0.027                                                   | 0.018                                                   | 0.013                                               | -25.311                                      |

960

961

962

#### 963 4. Further simulation results

964 We found that a global lockdown strategy had a larger temporal effect than local lockdowns and  
965 had by greater oscillations (Figure S4). We present here a model with seasonal forcing. Our model  
966 projections suggested that global lockdowns were less efficient and effective compared to a  
967 strategy that targets locally the elderly. However, due to high variability between the 250 regions  
968 considered, some regions undergo multiple lockdowns, while others will not undergo lockdowns.  
969 Local lockdowns that specifically target children decreases the local morbidity, but in the long run  
970 increases mortality, while lockdowns of individuals at high-risk has a moderate impact on  
971 transmission but decreases mortality.

972 These findings were robust across all settings considered (Table S3 and Table S5), when we  
973 accounted for seasonal forcing (Main text Figures 4 and 5), and without seasonal forcing (Figure  
974 S5).

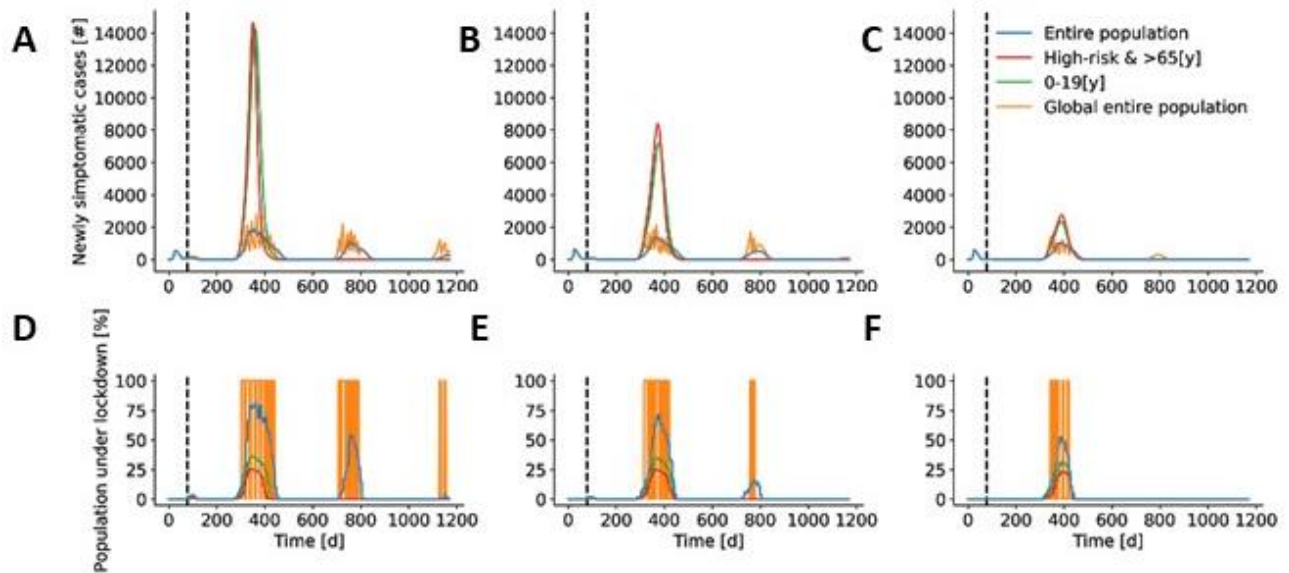

975

976 **Figure S4. Model demonstration for a threshold of 1 per 10000 for the lockdown strategies with seasonal forcing**  
977 **peaking on January 21.** (A – C) projected daily new reported cases for different lockdown strategies. (D – F)  
978 Projected daily percentage of population under lockdown. (A, D) for a unreported cases of 85%. (B, E) for 89%, and  
979 (C, F) for 93%.

980

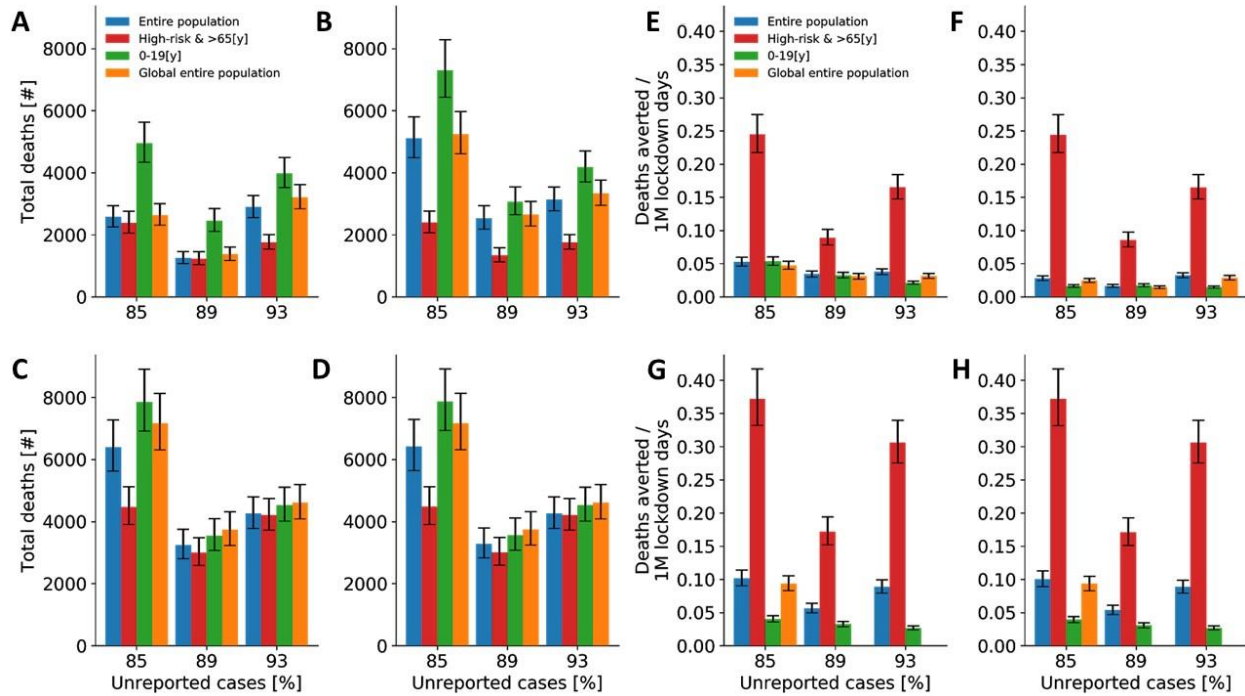

981  
 982 **Figure S5. Effectiveness and efficiency of temporal-local lockdowns without seasonal forcing.** Median and  
 983 interquartile values of model projections after implementation of strategies (A, C, E, G) after one year and (B, D, F,  
 984 H) after three years. (A, B, E, F) The thresholds for lockdowns in a local region are 1/10,000 [cases/individuals] and  
 985 (C, D, G, H) 5/10000 [cases/individuals]. Effectiveness (A – D), efficiency (E – G).  
 986
